# Supplementary material for: Trends in the Application of “Omics” to Ecotoxicology and Stress Ecology
Source: MDPI journal article supplement (doi:10.3390/genes12101481), 2021-09-23
Supplement: s1 [file s1]

## Trends in the Application of "Omics" to Ecotoxicology and Stress Ecology

Joshua Niklas Ebner<sup>1</sup>

<sup>1</sup> Spring Ecology Research Group, Department of Environmental Sciences, University of Basel, 4056 Basel, Switzerland; joshua.ebner@unibas.ch

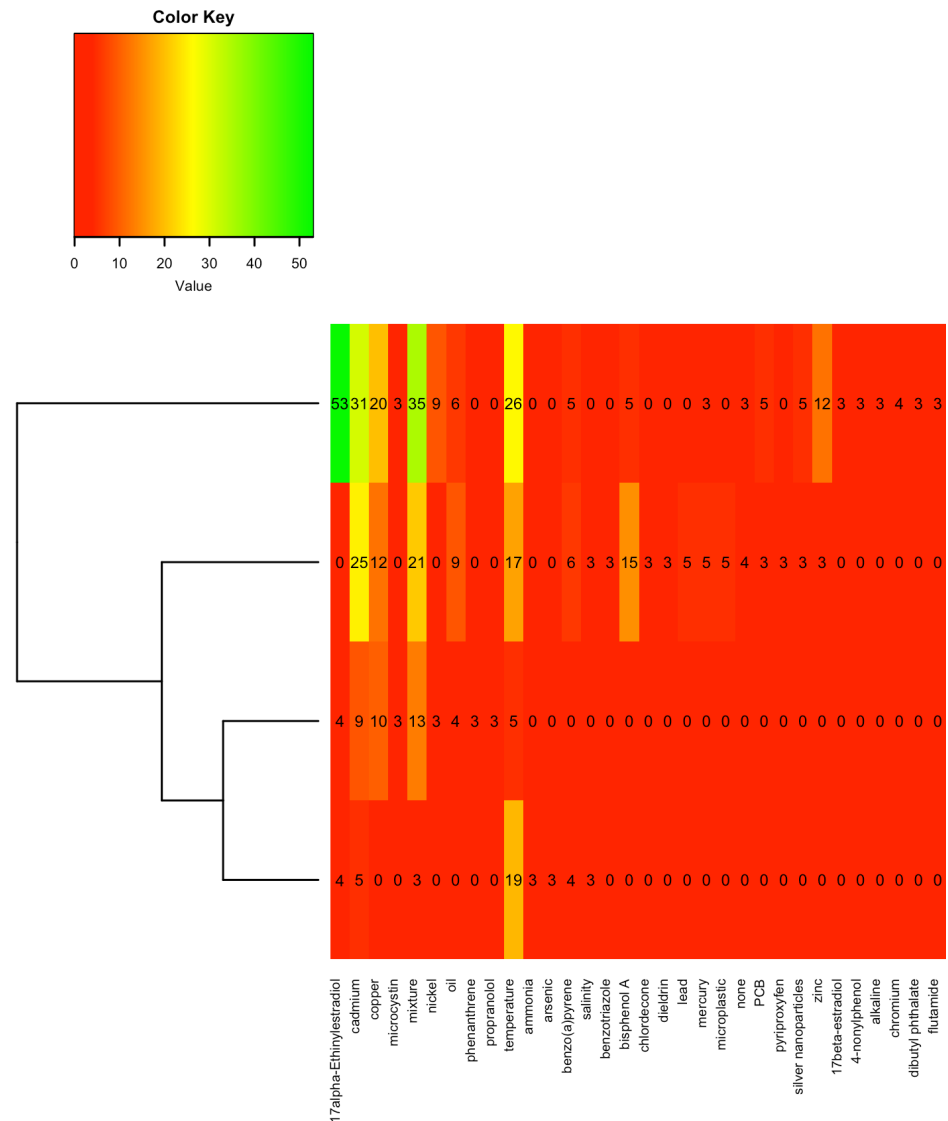

**S11 Figure S1:** Heatmap showing the number of times the adverse effects of a specific stressor has been investigated using one of the four omics methods.
