# Supplementary material for: Trends in the Application of “Omics” to Ecotoxicology and Stress Ecology
Source: Genes (Basel). 2021 Sep 23;12(10):1481. doi: 10.3390/genes12101481 (PMC8535992; doi:10.3390/genes12101481)
Supplement: Supplementary file 1 [file genes-12-01481-s001.zip › SI2.xlsx]

## Sheet: trends_data
Supporting Information 2 (SI2) for “Trends in the Application of “Omics” to Ecotoxicology and Stress Ecology”. Dataset used in the review. Joshua Niklas Ebner. Spring Ecology Research Group, Department of Environmental Sciences, University of Basel, 4056 Basel, Switzerland. E-Mail: joshua.ebner@unibas.ch
year	title	method	if_multi_omics	species	stressor	phylum	ecosystem	biome	kingdom	habitat	class	order	family
2020	Evidence-based assessment on environmental mixture using a concentration-dependent transcriptomics approach	transcriptomics		Danio_rerio	mixture	chordata	freshwater	aquatic	animalia	streams, canals, ditches, oxbow lakes, ponds, rice paddies	actinopterygii	cypriniformes	cyprinidae
2020	Multifactorial analysis of enviornmental metabolic data in ecotoxicology: wild marine mussel exposed to WWTP effluent as a case study	metabolomics		Mytilus_galloprovincialis	mixture	mollusca	marine	aquatic	animalia		bivalvia	mytilida	mytilidae
2020	In-plate toxicometabolomics of single zebrafish embryos	metabolomics		Danio_rerio	probranolol	chordata	freshwater	aquatic	animalia		actinopterygii	cypriniformes	cyprinidae
2019	A systems biology approach reveals neuronal and muscle developmental defects after chronic exposure to ionising radiation in zebrafish	multi_omics	tr_pr	Danio_rerio	radiation	chordata	freshwater	aquatic	animalia		actinopterygii	cypriniformes	cyprinidae
2019	Environmental transcriptomes of invasive dreissena, a model species in ecotoxicology and invasion biology	transcriptomics		dreissena_polymorpha	mixture	mollusca	freshwater	aquatic	animalia		bivalvia	myida	dreissenidae
2019	Environmental transcriptomes of invasive dreissena, a model species in ecotoxicology and invasion biology	transcriptomics		dreissena_rostriformis	mixture	mollusca	freshwater	aquatic	animalia		bivalvia	myida	dreissenidae
2019	Comparative proteomics in the wild: Accounting for intrapopulation variability improves describing proteome response in a Gammarus pulex field population exposed to cadmium	proteomics		gammarus_pulex	cadmium	arthropod	freshwater	aquatic	animalia		malacostraca	amphipoda	gammaridae
2019	Assessment of the ecotoxicological impact of natural and synthetic beta-triketone herbicides on the diversity and activity of the soil bacterial community using omic approaches	metabolomics		bacterial_community	leptospermone, sulcotrione	bac_community	soil	terrestrial	NA		NA	NA	NA
2018	Untargeted NMR-based metabolomics for field-scale monitoring: Temporal reproducibility and biomarker discovery in mosquitofish (Gambusia holbrooki) from a metal(loid)-contaminated wetland	metabolomics		gambusia_affinis	cadmium, 24dinitrophenol, probranolol	chordata	wetlands	mixture	animalia		actinopterygii	cyprinodontiformes	poeciliidae
2018	Metabolomics discovers early-response metabolic biomarkers that can predict chronic reproductive fitness in individual daphnia magna	metabolomics		daphnia_magna	cadmium, 24dinitrophenol, propranolol	arthropod	freshwater	aquatic	animalia		branchiopoda	cladocera	daphniidae
2018	Physiological effects caused by microcystin-producing and nonmicrocystin procuding microcystis aeruginosa on medaka fish: A proteomic and metabolmic study on liver	multi_omics	pr_me	Oryzias_latipes	microcystin	chordata	freshwater	aquatic	animalia		actinopterygii	beloniformes	adrianichthyidae
2016	Combined transcriptomic and proteomic approach to identify toxicity pathways in early life stages of japanese medaka (Oryzias latipes) exposed to 1,2,5,6-Tetrabromocyclooctane (TBCO)	multi_omics	tr_pr	Oryzias_latipes	TBCO	chordata	freshwater	aquatic	animalia		actinopterygii	beloniformes	adrianichthyidae
2016	Predicted chronic copper and nickel reproductive toxicity to Daphnia pulex-pulicaria from whole-animal metabolic profiles	metabolomics		Daphnia_pulex	copper, nickel	arthropod	freshwater	aquatic	animalia		branchiopoda	cladocera	daphniidae
2015	Ecotoxicogenomic approachs for understanding molecular mechanisms of environmental chemical toxicity using aquatic invertebrate, Daphnia model organisms	transcriptomics		daphnia_magna	silver nanoparticles	arthropod	freshwater	aquatic	animalia		branchiopoda	cladocera	daphniidae
2015	Transcriptome profile analysis reveals specific signatures of pollutants in Atlantic eels	transcriptomics		anguilla_rostrata	mixture	chordata	marine	aquatic	animalia		actinopterygii	anguilliformes	anguillidae
2013	Transcriptional responses indicate attenuated oxidative stress in the springtail Folsomia candida exposed to mixtures of cadmium and phenanthrene	transcriptomics		folsomia_candida	cadmium, phenanthrene	arthropod	soil	terrestrial	animalia		entognatha	collembola	isotomidae
2012	Pyrosequencing-based transcriptomic resources in the pond snail Lymnaea stagnalis, with a focus on genes involved in molecular response to diquat-induced stress	transcriptomics		lymnaea_stagnalis	diquat	mollusca	freshwater	aquatic	animalia		gastropoda	basommatophora	lymnaeidae
2010	Anchoring metabolic changes to phenotypic effects in the chlorophyte Scenedesmus vacuolatus under chemical exposure	metabolomics		scenedesmus_vacuolatus	PNA	chlorophyta	freshwater	aquatic	plantae		chlorophyceae	sphaeropleales	scenedesmaceae
2007	Metabolic profile biomarkers of metal contamination in a sentinel terrestrial species are applicable across multiple sites	metabolomics		lumbricus_rubellus	metal(loid)	annelid	soil	terrestrial	animalia		clitellata	opisthopora	lumbricidae
2006	The potential of ecotoxicoproteomics in environmental monitoring: Biomarker profiling in mussel plasma using proteinchip array technology	proteomics		mytilus_edulis	oil	mollusca	freshwater	aquatic	animalia		bivalvia	mytilida	mytilidae
2013	Application of a label-free, gel-free quantitative proteomics method for ecotoxicological studies of small fish species	proteomics		pimephales_promelas	fadrozile	chordata	freshwater	aquatic	animalia		actinopterygii	cypriniformes	cyprinidae
2019	Label-free and iTRAQ proteomics analysis in the liver of zebrafish (Danio rerio) following dietary exposure to the organochlorine pesticide dieldrin	proteomics		Danio_rerio	dieldrin	chordata	freshwater	aquatic	animalia		actinopterygii	cypriniformes	cyprinidae
2015	Gender differences in responses in Gammarus pulex exposed to BDE-47: a gel-free proteomic approach	proteomics		gammarus_pulex	BDE-47	arthropod	freshwater	aquatic	animalia		malacostraca	amphipoda	gammaridae
2017	Digging deeper into the pyriproxyfen-response of the amphipod gammarus fossarum with a next-generation ultra-high-field orbitrap analyser: new perspectives for enviornmental toxicoproteomics	proteomics		gammarus_fossarum	pyriproxyfen	arthropod	freshwater	aquatic	animalia		malacostraca	amphipoda	gammaridae
2018	Evaluation of uptake and chronic toxicity of virgin polystyrene microbeads in freshwater zebra mussel Dreissena polymorpha (Mollusca: bivalvia)	proteomics		dreissena_polymorpha	microplastic	mollusca	freshwater	aquatic	animalia		bivalvia	myida	dreissenidae
2019	First evidence of protein modulation by polystyrene microplastics in a freshwater biological model	proteomics		dreissena_polymorpha	microplastic	mollusca	freshwater	aquatic	animalia		bivalvia	myida	dreissenidae
2019	Exposure to microplastics reduces attachment strenght and alters the haemolymph proteome of blus mussels (Mytilus edulis)	proteomics		mytilus_edulis	microplastic	mollusca	marine	aquatic	animalia		bivalvia	mytilida	mytilidae
2016	Oyster reproduction is affected by exposure to polystyrene microplastics	transcriptomics		crassostrea_gigas	microplastic	mollusca	marine	aquatic	animalia		bivalvia	ostreida	ostreidae
2017	Transgenerational endocrine disruption and neurotoxicity in zebrafish larvae after parental exposure to binary mixtures of decabromodiphenyl ether (BDE-209) and lead	proteomics		Danio_rerio	BDE-209	chordata	freshwater	aquatic	animalia		actinopterygii	cypriniformes	cyprinidae
2019	Acute exposure to triphenyl phosphate (TPhP) disturbs ocular development and muscular organization in zebrafish larvae	proteomics		Danio_rerio	triphenyl phosphate	chordata	freshwater	aquatic	animalia		actinopterygii	cypriniformes	cyprinidae
2017	Differential effects of bisphenol A toxicity on oyster (Crasssostrea angulata) gonads as revealed by label-free quantiative proteomics	proteomics		Crassostrea_angulata	bisphenol A	mollusca	marine	aquatic	animalia		bivalvia	ostreida	ostreidae
2003	A DNA expression array to detect toxic stress response in European flounder (Platichthys flesus)	transcriptomics		Platichthys_flesus	mixture	chordata	marine	aquatic	animalia		actinopterygii	pleuronectiformes	pleuronectidae
2007	Development and validation of a 2,000-gene microarray for the fathead minnow (Pimephales promelas)	transcriptomics		pimephales_promelas	decabromodiphenyl_ether, lead	chordata	freshwater	aquatic	animalia		actinopterygii	cypriniformes	cyprinidae
2009	Biomarker discovery and transcriptomic responses in Daphnia magna exposed to munitions constituents	transcriptomics		daphnia_magna	TPhP	arthropod	freshwater	aquatic	animalia		branchiopoda	cladocera	daphniidae
2006	Gene expression patterns in rainbow trout, Oncorhynchus mykiss, exposed to a suite of model toxicants	transcriptomics		Oncorhynchus_mykiss	BPA	chordata	freshwater	aquatic	animalia		actinopterygii	salmoniformes	salmonidae
2006	Gene expression profiling in the neuroendocrine brain of male goldfish (Carassius auratus) exposed to 17alpha-ethinylestradiol	transcriptomics		carassius_auratus	17alpha-Ethinylestradiol	chordata	freshwater	aquatic	animalia		actinopterygii	cypriniformes	cyprinidae
2007	Microarray analysis in the zebrafish (Danio rerio) liver and telencephalon after exposure to low concentration of 17 alpha-ethinylestradiol	transcriptomics		Danio_rerio	ENMs	chordata	freshwater	aquatic	animalia		actinopterygii	cypriniformes	cyprinidae
2007	Gonadal transcriptome responses and physiological consequences of exposure to oestrogen in breeding zebrafish (Danio rerio)	transcriptomics		Danio_rerio	17alpha-Ethinylestradiol	chordata	freshwater	aquatic	animalia		actinopterygii	cypriniformes	cyprinidae
2007	Gene expression analysis of estrogenic compounds in the liver of common carp (Cyprinus carpio) using a custom cDNA microarray	transcriptomics		Cyprinus_carpio	bisphenol A, 17beta-estradiol, 4-nonylphenol, 17alpha-Ethinylestradiol	chordata	freshwater	aquatic	animalia		actinopterygii	cypriniformes	cyprinidae
2008	Transcriptomic responses of European flounder (Platichthys flesus) to model toxicants	transcriptomics		Platichthys_flesus	mixture	chordata	marine	aquatic	animalia		actinopterygii	pleuronectiformes	pleuronectidae
2009	Expression signatures for a model androgen and anti-androgen in the fathead minnow (Pimephales promelas) ovary	transcriptomics		pimephales_promelas	trenbolone, tlutamide	chordata	freshwater	aquatic	animalia		actinopterygii	cypriniformes	cyprinidae
2009	Site-specific impacts on gene expression and behavior in fathead minnows (Pimephales promelas) exposed in situ to streams adjacent to sewage treatment plants	transcriptomics		pimephales_promelas	mixture	chordata	freshwater	aquatic	animalia		actinopterygii	cypriniformes	cyprinidae
2006	Plasma proteome analysis reveals the geographical origin and liver tumor status of dad (Limanda limanda) from UK marine waters	proteomics		Limanda_limanda	mixture	chordata	marine	aquatic	animalia		actinopterygii	pleuronectiformes	pleuronectidae
2009	Liver proteome response of largemouth bass (Micropterus salmoides) exposed to several environmental contaminants: Potential insights into biomarker development	proteomics		Micropterus_salmoides	mixture	chordata	freshwater	aquatic	animalia		actinopterygii	perciformes	centrarchidae
2009	Protein profiles in zebrafish (Danio rerio) embryos exposed to perfluorooctane sulfonate	proteomics		Danio_rerio	perfluorooctane_sulfonate	chordata	freshwater	aquatic	animalia		actinopterygii	cypriniformes	cyprinidae
2009	Proteomic study of the effects of microcystin-LR on organelle and membrane proteins in medaka fish liver	proteomics		Oryzias_latipes	microcystin-LR	chordata	freshwater	aquatic	animalia		actinopterygii	beloniformes	adrianichthyidae
2008	Investigating compensation and recovery of fathead minnow (Pimephales promelas) exposed to 17a-ethynylestradiol with metabolite profiling	metabolomics		pimephales_promelas	17alpha-Ethinylestradiol	chordata	freshwater	aquatic	animalia		actinopterygii	cypriniformes	cyprinidae
2008	Molecular targets of TBBPA in zebrafish analysed through integration of genomic and proteomic approaches	multi_omics	tr_pr	Danio_rerio	TBBPA	chordata	freshwater	aquatic	animalia		actinopterygii	cypriniformes	cyprinidae
2009	Hepatic transcriptomic and metabolomic responses in the stickleback (Gasterosteus aculeatus) exposed to environmentally relevant concentrations of dibenzanthracene	multi_omics	tr_me	Gasterosteus_aculeatus	dibenzanthracene	chordata	marine	aquatic	animalia		actinopterygii	gasterosteiformes	gasterosteidae
2010	Hepatic transcriptomic and metabolomic responses in the stickleback (Gasterosteus aculeatus) exposed to ethinyl-estradiol	multi_omics	tr_me	Gasterosteus_aculeatus	17alpha-Ethinylestradiol	chordata	marine	aquatic	animalia		actinopterygii	gasterosteiformes	gasterosteidae
2010	Identifying health impacts of exposure to copper using transcriptomic and metabolimcs in a fish model	multi_omics	tr_me	Gasterosteus_aculeatus	copper	chordata	marine	aquatic	animalia		actinopterygii	gasterosteiformes	gasterosteidae
2017	Proteomic analysis of sockeye salmon serum as a tool for biomarker discovery and new insight into the sublethal toxicity of diluted bitumen	proteomics		oncorhynchus_nerka	bitumen	chordata	both	aquatic	animalia		actinopterygii	salmoniformes	salmonidae
2018	Transcriptional inhibition of TCDD-mediated induction of cytochrome P450 1A1 and alteration of protein expression in a zebrafish hepatic cell line following the administration of TCDD and cd(2)	transcriptomics		Danio_rerio	TCDD	chordata	freshwater	aquatic	animalia		actinopterygii	beloniformes	cyprinidae
2017	Linking genomic responses of gonads with reproductive impairment in marine medaka (Oryzias melastigma) exposed chronically to the chemopreventive and antifouling agent, 3,3’-diindolylmethane (DIM)	transcriptomics		Oryzias_latipes	33_diindolylmethane	chordata	freshwater	aquatic	animalia		actinopterygii	beloniformes	adrianichthyidae
2017	Molecular networks related to the immune system and mitochrondria are targets for the pesticide dieldrin in the zebrafish (Danio rerio) central nervous system	proteomics		Danio_rerio	copper	chordata	freshwater	aquatic	animalia		actinopterygii	cypriniformes	cyprinidae
2016	High conservation in transcriptomic and proteomic response of white sturgeon to equipotent concentrations of 2, 3, 7, 8-TCDD, PCB 77, and benzo pyrene	multi_omics	tr_pr	acipenser_transmontanus	TCDD, PCB77, benzo(a)pyrene	chordata	marine	aquatic	animalia		actinopterygii	acipenseriformes	acipenseridae
2018	Proteomic profile and toxicity pathway analysis in zebrafish embryos exposed to bisphenol a and di-n-butyl phthalate at environmentally relevant levels	proteomics		Danio_rerio	bisphenol A	chordata	freshwater	aquatic	animalia		actinopterygii	cypriniformes	cyprinidae
2018	Study of the plasma proteome of Atlantic cod (Gadus morhua): changes due to crude oil exposure	proteomics		Gadus_morhua	oil	chordata	marine	aquatic	animalia		actinopterygii	gadiformes	gadidae
2017	Impacts of triclosan exposure on zebrafish early-life stage: toxicity and acclimation mechanisms	proteomics		Danio_rerio	triclosan	chordata	freshwater	aquatic	animalia		actinopterygii	cypriniformes	cyprinidae
2017	Proteome response of fish under multiple stress exposure: effects of pesticide mixtures and temperature increase	proteomics		carassius_auratus	S-metolachlor, isoproturon, linuron, atrazine-desethyl, aclonifen, pendimethalin, tebuconazole	chordata	freshwater	aquatic	animalia		actinopterygii	cypriniformes	cyprinidae
2017	Ecotoxico-proteomics for aquatic environmental biomonitoring: first in situ application of a new proteomics-based multibiomarker assay using caged amphipods	proteomics		gammarus_fossarum	mixture	arthropod	freshwater	aquatic	animalia		malacostraca	amphipoda	gammaridae
2018	How cyclophosphamide at environmentally relevant concentration influences Daphnia magna life history and its proteome	proteomics		daphnia_magna	cyclophosphamide	arthropod	freshwater	aquatic	animalia		branchiopoda	cladocera	daphniidae
2019	Evaluation of mitochondrial toxicity of cadmium in clam Ruditapes philippinarum using iTRAQ-based proteomics	proteomics		ruditapes_philippinarum	cadmium	mollusca	marine	aquatic	animalia		bivalvia	venerida	veneridae
2017	Proteomic response of Macrobrachium rosenbergii hepatopancreas exposed to chlordecone: identification of endocrine disruption biomarkers?	proteomics		macrobrachium_rosenbergii	chlordecone	arthropod	freshwater	aquatic	animalia		malacostraca	decapoda	palaemonidae
2017	Histopathological and proteomic responses in male Chinese rare minnow (Gobicypris rarus) indicate hepatotoxicity following benzotriazole exposure	proteomics		gobiocypris_rarus	benzotriazole	chordata	freshwater	aquatic	animalia		actinopterygii	cypriniformes	cyprinidae
2018	Proteomic analysis of ametryn toxicity in zebrafish embryos	proteomics		Danio_rerio	ametryn	chordata	freshwater	aquatic	animalia		actinopterygii	cypriniformes	cyprinidae
2018	Proteomic response of gill microsomes of Crassostrea nrasiliana exposed to diesel fuel water-accommodated fraction	proteomics		crassostrea_brasiliana	diesel	mollusca	marine	aquatic	animalia		bivalvia	ostreida	ostreidae
2017	Inhibition of immune responses and related proteins in Rhamdia quelen exposed to diclofenac	proteomics		rhamdia_quelen	diclofenac	chordata	freshwater	aquatic	animalia		actinopterygii	siluriformes	heptapteridae
2019	Proteomic analysis of oxidized proteins in the brain and liver of the Nile tilapia (Oreochromis niloticus) exposed to a water-accommodated fraction of Maya crude oil	proteomics		oreochromis_niloticus	oil	chordata	freshwater	aquatic	animalia		actinopterygii	cichliformes	cichlidae
2000	Protein expression signatures and lysosomal stability in Mytilus edulis exposed to graded copper concentrations	proteomics		mytilus_edulis	copper	mollusca	marine	aquatic	animalia		bivalvia	mytilida	mytilidae
2000	Protein expression signatures identified in Mytilus edulis exposed to PCBs, copper and salinity stress	proteomics		mytilus_edulis	copper	mollusca	marine	aquatic	animalia		bivalvia	mytilida	mytilidae
2017	Toxic responses of Perna viridis hepatopancreas exposed to DDT, benzo(a)pyrene and their mixture uncovered by iTRAQ-based proteomics and NMR-based metabolomics	multi_omics	pr_me	perna_viridis	benzo(a)pyrene, DTT	mollusca	marine	aquatic	animalia		bivalvia	mytilida	mytilidae
2017	Global proteome profiling of a marine copepod and the mitigating effect of ocean acidification on mercury toxicity after multigenerational exposure	proteomics		tigriopus_japonicus	mercury	arthropod	marine	aquatic	animalia		hexanauplia	harpacticoida	harpacticidae
2018	ITRAQ-based quantitative proteomic analysis identified Eno1 as a cadmium stress response gene in Propsilocerus akamusi (Tokunaga) hemolymph	proteomics		propsilocerus_akamusi	cadmium	arthropod	freshwater	aquatic	animalia		insecta	diptera	chironomidae
2008	Proteomic and phosphoproteomic analysis of cellular responses in medaka fish (Oryzias latipes) following oral gavage with microcystin-LR	multi_omics	pr_pp	Oryzias_latipes	microcystin-LR	chordata	freshwater	aquatic	animalia		actinopterygii	beloniformes	adrianichthyidae
2006	Differential protein expression profiles in anterior gills of Eriocheir sinensis during acclimation to cadmium	proteomics		Eriocheir_sinensis	cadmium	arthropod	freshwater	aquatic	animalia		malacostraca	decapoda	varunidae
2009	Proteomic studies in zebrafish liver cells exposed to the brominated flame retardants HBCD and TBBPA	proteomics		Danio_rerio	HBCD, TBBPA	chordata	freshwater	aquatic	animalia		actinopterygii	cypriniformes	cyprinidae
2009	comparative proteomics analysis of cardiac muscle samples from pufferfish Takifugu rubripes exposed to excessive fluoride: Initial molecular response to fluorosis	proteomics		takifugu_rubripes	fluoride	chordata	marine	aquatic	animalia		actinopterygii	tetraodontiformes	tetraodontidae
2009	Proteomic analysis of hepatic tissue of zebrafish (Danio rerio) experimentally exposed to chronic microcystin-LR	proteomics		Danio_rerio	microcystin-LR	chordata	freshwater	aquatic	animalia		actinopterygii	cypriniformes	cyprinidae
2007	Proteomic analyses indicate induction of hepatic carbonyl reductase/20?-hydroxysteroid dehydrogenase B in rainbow trout exposed to sewage effluent	proteomics		Oncorhynchus_mykiss	mixture	chordata	freshwater	aquatic	animalia		actinopterygii	salmoniformes	salmonidae
2006	Comparison of protein expression in plasma from nonylphenol and bisphenol A-exposed Atlantic cod (Gadus morhua) turbot (Scophthalmus maximus) by use of SELDI-TOF	proteomics		Gadus_morhua	bisphenol A	chordata	freshwater	aquatic	animalia		actinopterygii	gadiformes	gadidae
2006	Acute toxicity profile of cadmium revealed by proteomics in brain tissue of Paralichthys olivaceus: Potential role of transferrin in cadmium toxicity	proteomics		Paralichthys_olivaceus	cadmium	chordata	marine	aquatic	animalia		actinopterygii	pleuronectiformes	paralichthyidae
2009	Proteomic changes in response to acute cadmium toxicity in gill tissue of Paralichthys olivaceus	proteomics		Paralichthys_olivaceus	cadmium	chordata	marine	aquatic	animalia		actinopterygii	pleuronectiformes	paralichthyidae
2008	Global quantitative analysis of protein expression and phosphorylation status in the liver of the medaka fish (Oryzias latipes) exposed to microcystin-LR I	multi_omics	pr_pp	Oryzias_latipes	microcystin-LR	chordata	freshwater	aquatic	animalia		actinopterygii	beloniformes	adrianichthyidae
2008	Utilization of protein expression profiles as indicators of environmental impairment of smallmouth bass (Micropterus dolomieu) from the Shenandoah River, Virginia, USA	proteomics		Micropterus_dolomieu	mixture	chordata	freshwater	aquatic	animalia		actinopterygii	perciformes	centrarchidae
2008	Proteomic study of the effects of complex environmental stresses in the livers of goldfish (Carassius auratus) that inhabit Gaobeidian Lake in Beijing, China	proteomics		carassius_auratus	mixture	chordata	freshwater	aquatic	animalia		actinopterygii	cypriniformes	cyprinidae
2004	Surface-enhanced laster desorption/ionization-time of flight-mass spectrometry approach to biomarker discovery in blue mussels (Mytilus edulis) exposed to polyaromatic hydrocarbons and heavy metals under field conditions	proteomics		mytilus_edulis	mixture	mollusca	marine	aquatic	animalia		bivalvia	mytilida	mytilidae
2004	Physiological and proteomic responses in Mytilus edulis exposed to PCBs and PAHs extracted from Baltic Sea sediments	proteomics		mytilus_edulis	PCB, PAH	mollusca	marine	aquatic	animalia		bivalvia	mytilida	mytilidae
2005	Proteome modifications of blue mussel (Mytilus edulis) gills as an effect of water pollution	proteomics		mytilus_edulis	mixture	mollusca	marine	aquatic	animalia		bivalvia	mytilida	mytilidae
2006	Protein responses in blue mussels (Mytilus edulis) exposed to organic pollutants: A combined CYP-antibody/proteomic approach	proteomics		mytilus_edulis	mixture	mollusca	marine	aquatic	animalia		bivalvia	mytilida	mytilidae
2006	Identification of proteomic signatures of exposure to marine pollutants in mussels (Mytilus edulis)	proteomics		mytilus_edulis	mixture	mollusca	marine	aquatic	animalia		bivalvia	mytilida	mytilidae
2006	Utility of proteomics to assess pollutant response of clams from the Donana bank of Guadalquivir Estury (SW Spain)	proteomics		scrobicularia_plana	mixture	mollusca	marine	aquatic	animalia		bivalvia	cardiida	semelidae
2009	Effect of cadmium in the clam Ruditapes decussatus assessed by proteomic analysis	proteomics		ruditapes_decussatus	cadmium	mollusca	marine	aquatic	animalia		bivalvia	venerida	veneridae
2006	Protein carbonylation and head shock response in Ruditapes decussatus following p,p’-dichlorodiphenyldichloroethylene (DDE) exposure: A proteomic approach reveals that DDE causes oxidative stress	proteomics		ruditapes_decussatus	DDE	mollusca	marine	aquatic	animalia		bivalvia	venerida	veneridae
2004	Changes in protein expression profiles in bivalve molluscs (Chamaelea gallina) exposed to four model environmental pollutants	proteomics		chamelea_gallina	PCB, copper, tributyltin, arsenic	mollusca	marine	aquatic	animalia		bivalvia	venerida	veneridae
2006	An ecotoxicoproteomic approach (SELDI-TOF mass spectrometry) to biomarker discovery in crab exposed to pollutants under laboratory conditions	proteomics		hyas_araneus	bisphenol A, DAP, PBDE-47	arthropod	marine	aquatic	animalia		malacostraca	decapoda	oregoniidae
2009	Effect of cadmium exposure on the globin protein expression in 4th instar larvae of Chironomus riparius Mg. (Diptera_ Chironomidae): An ecotoxicoproteomics approach	proteomics		chironomus_riparius	cadmium	arthropod	freshwater	aquatic	animalia		insecta	diptera	chironomidae
2006	Proteomic evaluation of cadmium toxicity on the midge Chironomus riparius Meigen larvae	proteomics		chironomus_riparius	cadmium	arthropod	freshwater	aquatic	animalia		insecta	diptera	chironomidae
2007	Effect of oxidative stress on protein thiols in the blue mussel Mytilus edulis: Proteomic identification of target proteins	proteomics		mytilus_edulis	oxidative_stress	mollusca	marine	aquatic	animalia		bivalvia	mytilida	mytilidae
2010	Environmentally relevant exposure to 17a-ethinylestradiol affects the telencephalic proteomce of male flathead minnows	proteomics		pimephales_promelas	17alpha-Ethinylestradiol	chordata	freshwater	aquatic	animalia		actinopterygii	cypriniformes	cyprinidae
2013	Molecular adaptations of Helicoverpa armigera midgut tissue under pyrethroid insecticide stress characterized by differential proteome analysis and enzyme activity assay	proteomics		helicoverpa_armigera	pyrethroid	arthropod	multiple	terrestrial	animalia		insecta	lepidoptera	noctuidae
2013	Comparative proteomic identification of the hemocyte response to cold stress in white shrimp, Litopenaeus vannamei	proteomics		litopenaeus_vannamei	temperature	arthropod	marine	aquatic	animalia		malacostraca	decapoda	penaeidae
2015	Proteomic and metabolomic analysis of earthworm Eisenia fetida exposed to different concentrations of 2,2’,4,4’-tetrabromodiphenyl ether	proteomics		eisenia_fetida	2244_tetrabromodiphenyl_ether	annelid	multiple	terrestrial	animalia		clitellata	opisthopora	lumbricidae
2012	Proteomic analysis of blood cells in fish exposed to chemotherapeutics: evidence for long term effects	proteomics		pangasianodon_hypophthalmus	malachite_green	chordata	freshwater	aquatic	animalia		actinopterygii	siluriformes	pangasiidae
2013	Proteomic approach for identifying gonad differential proteins in the oyster (Crassostrea angulata) following food-chain contamination with HgCl2	proteomics		Crassostrea_angulata	mercury	mollusca	marine	aquatic	animalia		bivalvia	ostreida	ostreidae
2010	Protein differential expression induced by endocrine disrupting compounds in a terrestrial isopod	proteomics		porcellio_scaber	bisphenol A, vinclozolin	arthropod	multiple	terrestrial	animalia		malacostraca	isopoda	porcellionidae
2015	Shotgun ecotoxicoproteomics of Daphnia pulex: biochemical effects of the anticancer drug tamoxifen	proteomics		daphnia_magna	tamoxifen	arthropod	freshwater	aquatic	animalia		branchiopoda	cladocera	daphniidae
2016	Shotgun proteomics to unravel marine mussel (Mytilus edulis) response to long-term exposure to low salinity and propranolol in a Baltic Sea microcosm	proteomics		mytilus_edulis	propranolol	mollusca	marine	aquatic	animalia		bivalvia	mytilida	mytilidae
2015	Proteomic investigation of male Gammarus fossarum, a freshwater crustacean, in response to endocrine disruptors	proteomics		gammarus_fossarum	cadmium, methoxygenozide, pyriproxyfen	arthropod	freshwater	aquatic	animalia		malacostraca	amphipoda	gammaridae
2017	Ecotoxicoproteomic assessment of the functional alterations caused by chronic metallic exposures in gammarids	proteomics		gammarus_fossarum	metal(loid)	arthropod	freshwater	aquatic	animalia		malacostraca	amphipoda	gammaridae
2016	Using a novel “Integrated Biomarker Proteomic” index to assess the effects of freshwater pollutants in European eel peripheral blood mononuclear cells	proteomics		anguilla_anguilla	DDT, cadmium	chordata	freshwater	aquatic	animalia		actinopterygii	anguilliformes	anguillidae
2009	Acclimatory responses of the Daphnia pulex proteome to environmental changes. II. Chronic exposure to different temperatures (10 and 20 degrees C) mainly affects protein metabolism	proteomics		Daphnia_pulex	temperature	arthropod	freshwater	aquatic	animalia		branchiopoda	cladocera	daphniidae
2012	Assessment of chemical mixtures and groundwater effects on Daphnia magna transcriptomics	transcriptomics		daphnia_magna	mixture	arthropod	freshwater	aquatic	animalia		branchiopoda	cladocera	daphniidae
2009	Acclimatory responses of the Daphnia pulex proteome to environmental changes. II. Chronic exposure to different temperatures (10 and 20 degrees C) mainly affects protein metabolism	proteomics		Daphnia_pulex	temperature	arthropod	freshwater	aquatic	animalia		branchiopoda	cladocera	daphniidae
2012	Assessment of chemical mixtures and groundwater effects on Daphnia magna transcriptomics	transcriptomics		daphnia_magna	mixture	arthropod	freshwater	aquatic	animalia		branchiopoda	cladocera	daphniidae
2009	Biomarker Discovery and Transcriptomic Responses in Daphnia magna exposed to Munitions Constituents	transcriptomics		daphnia_magna	mixture	arthropod	freshwater	aquatic	animalia		branchiopoda	cladocera	daphniidae
2010	Can metal stress induce transferable changes in gene transcription in Daphnia magna?	transcriptomics		daphnia_magna	zinc	arthropod	freshwater	aquatic	animalia		branchiopoda	cladocera	daphniidae
2015	Chronic toxicity evaluation of the flame retardant tris (2-butoxyethyl) phosphate (TBOEP) using Daphnia magna transcriptomic response	transcriptomics		daphnia_magna	TBOEP	arthropod	freshwater	aquatic	animalia		branchiopoda	cladocera	daphniidae
2017	Comparative ovarian microarray analysis of juvenile hormone-responsive genes in water flea Daphnia magna: potential targets for toxicity	transcriptomics		daphnia_magna	fenoxycarb, methyl farnesoate	arthropod	freshwater	aquatic	animalia		branchiopoda	cladocera	daphniidae
2017	Conserved Transcription Factors Steer Growth-Related Genomic Programs in Daphnia	transcriptomics		Daphnia_pulex	temperature	arthropod	freshwater	aquatic	animalia		branchiopoda	cladocera	daphniidae
2015	Conserved transcriptional responses to cyanobacterial stressors are mediated by alternate regulation of paralogous genes in Daphnia	transcriptomics		Daphnia_pulex	microcystin	arthropod	freshwater	aquatic	animalia		branchiopoda	cladocera	daphniidae
2007	Daphnia magna and ecotoxicogenomics: gene expression profiles of the anti-ecdysteroidal fungicide fenarimol using energy-, molting- and life stage-related cDNA libraries	transcriptomics		daphnia_magna	fenarimol	arthropod	freshwater	aquatic	animalia		branchiopoda	cladocera	daphniidae
2007	Daphnia magna Ecotoxicogenomics Provides Mechanistic Insights into Metal Toxicity	transcriptomics		daphnia_magna	cadmium, copper, zinc	arthropod	freshwater	aquatic	animalia		branchiopoda	cladocera	daphniidae
2014	Deciphering the genetic basis of microcystin tolerance	transcriptomics		daphnia_magna	microcystin	arthropod	freshwater	aquatic	animalia		branchiopoda	cladocera	daphniidae
2015	Differential transcriptomic responses of ancient and modern Daphnia genotypes to phosphorus supply	transcriptomics		Daphnia_pulex	phosphorus	arthropod	freshwater	aquatic	animalia		branchiopoda	cladocera	daphniidae
2017	Early transcriptional response pathways in Daphnia magna are coordinated in networks of crustacean-specific genes	transcriptomics		daphnia_magna	carbaryl	arthropod	freshwater	aquatic	animalia		branchiopoda	cladocera	daphniidae
2008	Ecological genomics in Daphnia : stress responses and environmental sex determination	transcriptomics		Daphnia magna and Daphnia pulex	methyl_farnesoate	arthropod	freshwater	aquatic	animalia		branchiopoda	cladocera	daphniidae
2016	Endocrine-disruption potential of perfluoroethylcyclohexane sulfonate (PFECHS) in chronically exposed Daphnia magna	transcriptomics		daphnia_magna	PFECHS	arthropod	freshwater	aquatic	animalia		branchiopoda	cladocera	daphniidae
2014	Functional genomics of acclimation and adaptation in response to thermal stress in Daphnia	transcriptomics		Daphnia_pulex	temperature	arthropod	freshwater	aquatic	animalia		branchiopoda	cladocera	daphniidae
2008	Gene Expression Profiling in Daphnia magna Part I: Concentration-Dependent Profiles Provide Support for the No Observed Transcriptional Effect Level	transcriptomics		daphnia_magna	copper, cadmium, zinc	arthropod	freshwater	aquatic	animalia		branchiopoda	cladocera	daphniidae
2008	Gene Expression Profiling in Daphnia magna, Part II: Validation of a Copper Specific Gene Expression Signature with Effluent from Two Copper Mines in California	transcriptomics		daphnia_magna	copper, cadmium, zinc	arthropod	freshwater	aquatic	animalia		branchiopoda	cladocera	daphniidae
2013	Gene expression profiling of three different stressors in the water flea Daphnia magna	transcriptomics		daphnia_magna	carbaryl	arthropod	freshwater	aquatic	animalia		branchiopoda	cladocera	daphniidae
2007	Gene response profiles for Daphnia pulex exposed to the environmental stressor cadmium reveals novel crustacean metallothioneins	transcriptomics		Daphnia_pulex	cadmium	arthropod	freshwater	aquatic	animalia		branchiopoda	cladocera	daphniidae
2010	Gene transcription and higher-level effects of multigenerational Zn exposure in Daphnia magna	transcriptomics		daphnia_magna	zinc	arthropod	freshwater	aquatic	animalia		branchiopoda	cladocera	daphniidae
2015	Gene transcription, metabolite and lipid profiling in eco-indicator Daphnia magna indicate diverse mechanisms of toxicity by legacy and emerging flame-retardants	transcriptomics		daphnia_magna	flame_retardants	arthropod	freshwater	aquatic	animalia		branchiopoda	cladocera	daphniidae
2016	Genome-wide profiling of 24 hr diel rhythmicity in the water flea, Daphnia pulex: network analysis reveals rhythmic gene expression and enhances functional gene annotation	transcriptomics		Daphnia_pulex	light_dark_cycle	arthropod	freshwater	aquatic	animalia		branchiopoda	cladocera	daphniidae
2014	Genome-wide transcription profiles reveal genotype-dependent responses of biological pathways and gene-families in Daphnia exposed to single and mixed stressors	transcriptomics		Daphnia_pulex	cadmium, microcystin	arthropod	freshwater	aquatic	animalia		branchiopoda	cladocera	daphniidae
2013	Genomic expression responses toward bisphenol-A toxicity in Daphnia magna in terms of reproductive activity	transcriptomics		daphnia_magna	bisphenol A	arthropod	freshwater	aquatic	animalia		branchiopoda	cladocera	daphniidae
2011	How do consumers deal with stoichiometric constraints? Lessons from functional genomics using Daphnia pulex	transcriptomics		Daphnia_pulex	phosphorous	arthropod	freshwater	aquatic	animalia		branchiopoda	cladocera	daphniidae
2008	Integration of molecular with higher-level effects of dietary zinc exposure in Daphnia magna	transcriptomics		daphnia_magna	zinc	arthropod	freshwater	aquatic	animalia		branchiopoda	cladocera	daphniidae
2015	Ionotropic glutamate receptors mediate inducible defense in the water flea Daphnia pulex	transcriptomics		Daphnia_pulex	kairomones	arthropod	freshwater	aquatic	animalia		branchiopoda	cladocera	daphniidae
2008	Linking Molecular and Population Stress Responses in Daphnia magna exposed to cadmium	transcriptomics		daphnia_magna	cadmium	arthropod	freshwater	aquatic	animalia		branchiopoda	cladocera	daphniidae
2014	Molecular impact of juvenile hormone agonists on neonatal Daphnia magna	transcriptomics		daphnia_magna	methoprene, fenoxycarb, epofenonane	arthropod	freshwater	aquatic	animalia		branchiopoda	cladocera	daphniidae
2006	Molecular impact of propiconazole on Daphnia magna using a reproduction-related cDNA array	transcriptomics		daphnia_magna	propiconazole	arthropod	freshwater	aquatic	animalia		branchiopoda	cladocera	daphniidae
2007	Molecular responses during cadmium-induced stress in Daphnia magna: integration of differential gene expression with higher-level effects	transcriptomics		daphnia_magna	cadmium	arthropod	freshwater	aquatic	animalia		branchiopoda	cladocera	daphniidae
2009	Nickel and binary metal mixture responses in Daphnia magna: molecular fingerprints and (sub)organismal effects	transcriptomics		daphnia_magna	nickel, cadmium, Lead	arthropod	freshwater	aquatic	animalia		branchiopoda	cladocera	daphniidae
2011	Nickel response in function of temperature differences: effects at different levels of biological organization in Daphnia magna	transcriptomics		daphnia_magna	nickel, temperature	arthropod	freshwater	aquatic	animalia		branchiopoda	cladocera	daphniidae
2015	NMDA receptor activation upstream of methyl farnesoate signaling for short day-induced male offspring production in the water flea, Daphnia pulex	transcriptomics		Daphnia_pulex	methyl farnesoate	arthropod	freshwater	aquatic	animalia		branchiopoda	cladocera	daphniidae
2012	Population genomics of resource exploitation: insights from gene expression profiles of two Daphnia ecotypes fed alternate resources	transcriptomics		Daphnia_pulex	ankistrodesmus falcatus, seston	arthropod	freshwater	aquatic	animalia		branchiopoda	cladocera	daphniidae
2013	Silver Nanowire Exposure Results in Internalization and Toxicity to Daphnia magna	transcriptomics		daphnia_magna	silver nanoparticles	arthropod	freshwater	aquatic	animalia		branchiopoda	cladocera	daphniidae
2008	Systems biology meets stress ecology: linking molecular and organismal stress responses in Daphnia magna	transcriptomics		daphnia_magna	ibuprofen	arthropod	freshwater	aquatic	animalia		branchiopoda	cladocera	daphniidae
2012	The evolution of salinity tolerance in Daphnia : a functional genomics approach	transcriptomics		Daphnia_pulex	salinity	arthropod	freshwater	aquatic	animalia		branchiopoda	cladocera	daphniidae
2013	The good, the bad, and the toxic: approaching hormesis in Daphnia magna exposed to an energetic compound	transcriptomics		daphnia_magna	TNT	arthropod	freshwater	aquatic	animalia		branchiopoda	cladocera	daphniidae
2012	Toxicogenomic responses of nanotoxicity in Daphnia magna exposed to silver nitrate and coated silver nanoparticles	transcriptomics		daphnia_magna	silver nanoparticles	arthropod	freshwater	aquatic	animalia		branchiopoda	cladocera	daphniidae
2015	Transcriptional changes during Daphnia pulex development indicate that the maturation decision resembles a rate more than a threshold	transcriptomics		Daphnia_pulex	developmental_stages	arthropod	freshwater	aquatic	animalia		branchiopoda	cladocera	daphniidae
2016	Transcriptomic alterations in Daphnia magna embryos from mothers exposed to hypoxia	transcriptomics		daphnia_magna	hypoxia	arthropod	freshwater	aquatic	animalia		branchiopoda	cladocera	daphniidae
2017	Transcriptomic responses of the endangered freshwater mussel Margaritifera margaritifera to trace metal contamination in the Dronne River France	transcriptomics		margaritifera_margaritifera	chromium, zinc, cadmium, nickel	mollusca	freshwater	aquatic	animalia		bivalvia	unionida	margaritiferidae
2018	Ecotoxicological effects of the herbicide glyphosate in non-target aquatic species: transcriptional responses in the mussel Mytilus galloprovincialis	transcriptomics		Mytilus_galloprovincialis	glyphosate	mollusca	marine	aquatic	animalia		bivalvia	mytilida	mytilidae
2015	Deciphering the molecular adaptation of the king scallop (Pecten maximus) to heat stress using transcriptomics and proteomics	multi_omics	tr_pr	pecten_maximus	temperature	mollusca	marine	aquatic	animalia		bivalvia	pectinida	pectinidae
2013	Identification of molecular and physiological responses to chronic environmental challenge in an invasive species: the Pacific oyster Crassostrea gigas	transcriptomics		crassostrea_gigas	mixture	mollusca	marine	aquatic	animalia		bivalvia	ostreida	ostreidae
2010	Transcriptomic responses to heat stress in invasive and native blue mussels (genus Mytilus): molecular correlates of invasive success	transcriptomics		mytilus_edulis	temperature	mollusca	marine	aquatic	animalia		bivalvia	mytilida	mytilidae
2019	Coupling caging and proteomics on the European flounder (Platichthys flesus) to assess the estuarine water quality at micro scale	proteomics		Platichthys_flesus	mixture	chordata	marine	aquatic	animalia		actinopterygii	pleuronectiformes	pleuronectidae
2018	Multiple bioanalytical method to reveal developmental biological responses in zebrafish embryos exposed to triclocarban	proteomics		Danio_rerio	triclocarban	chordata	freshwater	aquatic	animalia		actinopterygii	cypriniformes	cyprinidae
2017	2D-DIGE as a proteomic biomarker discovery tool in environmental studies with Procambarus clarkii	proteomics		procambarus_clarkii	multiple	arthropod	freshwater	aquatic	animalia		malacostraca	decapoda	cambaridae
2008	Pollution-affectd fish hepatic transcriptome and its expression patterns on exposure to cadmium	transcriptomics		lithognathus_mormyrus	cadmium	chordata	marine	aquatic	animalia		actinopterygii	perciformes	sparidae
2005	comparative effects of dietary methylmercury on gene expression in liver, skeletal muscle, and brain of the zebrafish (Danio rerio)	transcriptomics		Danio_rerio	methylmercury	chordata	freshwater	aquatic	animalia		actinopterygii	cypriniformes	cyprinidae
2008	Toxicity evaluation of perfluorooctane sulfonate (PFOS) in the liver of common carp (Cyprinus carpio)	transcriptomics		Cyprinus_carpio	PFOS	chordata	freshwater	aquatic	animalia		actinopterygii	cypriniformes	cyprinidae
2013	Mechanistic toxicity of perfluorooctanois acid in zebrafish suggests mitochondrial dysfunction to play a key role in PFOA toxicity	multi_omics	tr_pr	Danio_rerio	PFOA	chordata	freshwater	aquatic	animalia		actinopterygii	cypriniformes	cyprinidae
2013	Impacts of benzo(a)pyrene, Cu and their mixture on the proteomic response of Mytilus galloprovincialis	proteomics		Mytilus_galloprovincialis	benzo(a)pyrene, copper	mollusca	marine	aquatic	animalia		bivalvia	mytilida	mytilidae
2013	Transcriptional response of the mussel Mytilus galloprovincialis (Lam.) following exposure to heat stress and copper	transcriptomics		Mytilus_galloprovincialis	temperature, copper	mollusca	marine	aquatic	animalia		bivalvia	mytilida	mytilidae
2011	Effects of chronic metal exposure on wild fish populations revealed by high-throughput cDNA sequencing	transcriptomics		perca_flavescens	metal(loid)	chordata	freshwater	aquatic	animalia		actinopterygii	perciformes	percidae
2014	Correlation of transcriptomic responses and metal bioaccumulation in Mytilus edulis L. Reveals early indicators of stress	transcriptomics		mytilus_edulis	metal(loid)	mollusca	marine	aquatic	animalia		bivalvia	mytilida	mytilidae
2013	Detecting genome-wide gene transcription profiles associated with high pollution burden in the critically endangered European eel	transcriptomics		anguilla_anguilla	mixture	chordata	freshwater_marine	aquatic	animalia		actinopterygii	anguilliformes	anguillidae
2013	Proteomic and metabolomic responses of clam Ruditapes philippinarum to arsenic exposure under different salinities	multi_omics	tr_pr	ruditapes_philippinarum	arsenic, salinity	mollusca	marine	aquatic	animalia		bivalvia	venerida	veneridae
2010	changes in gene expression profile of medaka with acute toxicity of Arochlor 1260, a polychlorinated biphenyl mixture	transcriptomics		Oryzias_latipes	PCB	chordata	freshwater	aquatic	animalia		actinopterygii	beloniformes	adrianichthyidae
2020	Hypoxia causes sex-specific hepatic toxicity at the transcriptome level in marine medaka (Oryzias melastigma)	transcriptomics		Oryzias_latipes	hypoxia	chordata	freshwater	aquatic	animalia		actinopterygii	beloniformes	adrianichthyidae
2017	Proteomic responses of marine medaka (Oryzias melastigma) to chronic high environment ammonia exposure	proteomics		Oryzias melastigma	ammonia	chordata	marine	aquatic	animalia		actinopterygii	beloniformes	adrianichthyidae
2020	Differential gene expression profile of male and female copepods in response to cadmium exposure	transcriptomics		pseudodiaptomus_annandalei	cadmium	arthropod	freshwater_marine	aquatic	animalia		hexanauplia	calanoida	pseudodiaptomidae
2015	Identification of xenobiotic biodegradation and metabolism-related genes in the copepod Tigriopus japonicus whole transcriptome analysis	transcriptomics		tigriopus_japonicus	none	arthropod	marine	aquatic	animalia		hexanauplia	harpacticoida	harpacticidae
2018	RNA-Seq-based transcriptome profiling and expression of 16 cytochrome P450 genes in the benzo[alpha]pyrene-exposed estuarine copepod Eurytemora affinis	transcriptomics		eurytemora_affiinis	benzo(a)pyrene	arthropod	freshwater_marine	aquatic	animalia		hexanauplia	calanoida	temoridae
2016	Transcriptome analysis of the copepod Eurytemora affinis upon exposure to endocrine disruptor pesticides: focus on reproduction and development	transcriptomics		eurytemora_affiinis	PFX, CLD	arthropod	freshwater_marine	aquatic	animalia		hexanauplia	calanoida	temoridae
2015	A transcriptome resource for the copepod Calanus glacialis across a range of culture temperatures	transcriptomics		calanus_glacialis	temperature	arthropod	marine	aquatic	animalia		hexanauplia	calanoida	calanidae
2019	The transcriptome of the marine calanoid copepod Temora longicornis under heat stress and recovery	transcriptomics		temora_longicornis	temperature	arthropod	marine	aquatic	animalia		hexanauplia	calanoida	temoridae
2020	Acute and chronic effects of polystyrene microplastics on brine shrimp: first evidence highlighting the molecular mechanism through transcriptome analysis	transcriptomics		artemia_salina	microplastic	arthropod	freshwater	aquatic	animalia		branchiopoda	anostraca	artemiidae
2018	De novo transcriptome assembly and differential gene expression analysis of the calanoid copepod Acartia tonsa exposed to nickel nanoparticles	transcriptomics		acartia_tonsa	nickel	arthropod	marine	aquatic	animalia		hexanauplia	calanoida	acartiidae
2018	Proteomic and metabolomic analysis of marine medaka (Oryzias melastigma) after acute ammonia exposure	multi_omics	tr_pr	oryzias_melastigma	ammonia	chordata	freshwater	aquatic	animalia		actinopterygii	beloniformes	adrianichthyidae
2018	NMR-based metabolomic approach to elucidate the differential cellular responses during mitigation of arsenic(III, V) in green microalga	metabolomics		scenedesmus_sp	arsenic	chlorophyta	freshwater	aquatic	plantae		chlorophyceae	sphaeropleales	scenedesmaceae
2019	Non-target metabolomic profiling of the marine microalgae Dunaliella tertiolecta after exposure to diuron using complementary High-Resolution analytical techniques	metabolomics		dunaliella_tertiolecta	diuron	chlorophyta	marine	aquatic	plantae		chlorophyceae	chlamydomonadales	dunaliellaceae
2013	Impact of environmental pollution on caged mussels Mytilus galloprovincialis using NMR-based metabolomics	metabolomics		Mytilus_galloprovincialis	mixture	mollusca	marine	aquatic	animalia		bivalvia	mytilida	mytilidae
2017	comparative metabolomic analysis of the green microalga Chlorella sorokiniana cultivated in the single culture and a consortium with bacteria for wastewater remediation	metabolomics		chlorella_sorokiniana	none	chlorophyta	freshwater	aquatic	plantae		trebouxiophyceae	chlorellales	chlorellaceae
2012	Metabolomic investigation of Mytilus galloprovincialis (Lamarck 1819) caged in aquatic environments	metabolomics		Mytilus_galloprovincialis	mixture	mollusca	marine	aquatic	animalia		bivalvia	mytilida	mytilidae
2018	A freshwater diatom challenged by Zn: Biochemical, physiological and metabolomic responses of Tabellaria flocculosa (Roth) Kützing	metabolomics		tabellaria_flocculosa	zinc	ochrophyta	freshwater	aquatic	chromista		bacillariophyceae	tabellariales	tabellariaceae
2018	Assessing Cu impacts on freshwater diatoms: Biochemical and metabolomic responses of Tabellaria flocculosa (Roth) Kützing	metabolomics		tabellaria_flocculosa	copper	ochrophyta	freshwater	aquatic	chromista		bacillariophyceae	tabellariales	tabellariaceae
2006	Effect of copper exposure on gene expression profiles in Chlamydomonas reinhardtii based on microarray analysis	transcriptomics		chlamydomonas_reinhardtii	copper	chlorophyta	freshwater	aquatic	plantae		chlorophyceae	chlamydomonadales	chlamydomonadaceae
2013	An omics based assessment of cadmium toxicity in the green alga Chlamydomonas reinhardtii	multi_omics	tr_me	chlamydomonas_reinhardtii	cadmium	chlorophyta	freshwater	aquatic	plantae		chlorophyceae	chlamydomonadales	chlamydomonadaceae
2013	Copper toxicity in the microalga Chlamydomonas reinhardtii: an integrated approach	metabolomics		chlamydomonas_reinhardtii	copper	chlorophyta	freshwater	aquatic	plantae		chlorophyceae	chlamydomonadales	chlamydomonadaceae
2009	A metabolomics approach to assessing phytotoxic effects on the green alga Scenedesmus vacuolatus	metabolomics		scenedesmus_vacuolatus	prometryn	chlorophyta	freshwater	aquatic	plantae		chlorophyceae	sphaeropleales	scenedesmaceae
2016	Arsenite response in Coccomyxa sp. Carn explored by transcriptomic and non-targeted metabolomic approaches	multi_omics	tr_me	coccomyxa_sp	arsenic	chlorophyta	multiple	aquatic	plantae		trebouxiophyceae	trebouxiophyceae ordoincertae sedis	coccomyxaceae
2012	Characterizing the effect of heavy metal contamination on marine mussels using metabolomics	metabolomics		mytilus_edulis	mixture	mollusca	marine	aquatic	animalia		bivalvia	mytilida	mytilidae
2009	A new approach to toxicity testing in Daphnia magna: Application of high throughput FT-ICR mass spectrometry metabolomics	metabolomics		daphnia_magna	copper	arthropod	freshwater	aquatic	animalia		branchiopoda	cladocera	daphniidae
2009	An environmental 1H NMR metabolomic study of the exposure of the marine mussel Mytilus edulis to atrazine, lindane, hypoxia and starvation	metabolomics		mytilus_edulis	atrazine, lindane, hypoxia	mollusca	marine	aquatic	animalia		bivalvia	mytilida	mytilidae
2014	NMR-based metabolomics and LC-MS/MS quantification reveal metal-specific tolerance and redox homeostasis in Chlorella vulgaris	metabolomics		chlorella_vulgaris	copper, cadmium, lead	chlorophyta	freshwater	aquatic	plantae		trebouxiophyceae	chlorellales	chlorellaceae
2015	Metallomics and NMR-based metabolomics of Chlorella sp. Reveal the synergistic role of copper and cadmium in multi-metal toxicity and oxidative stress	metabolomics		chlorella_sp	copper, cadmium	chlorophyta	freshwater	aquatic	plantae		trebouxiophyceae	chlorellales	chlorellaceae
2016	Plasma proteome profiles of White Sucker (Catostomus commersonii) from the Athabasca River within the oil sands deposit	proteomics		catostomus_commersonii	oil	chordata	freshwater	aquatic	animalia		actinopterygii	cypriniformes	catostomidae
2015	Lithium an emerging contaminant: Bioavailability, effects on protein expression, and homeostasis disruption in short-term exposure of rainbow trout	proteomics		Oncorhynchus_mykiss	lithium	chordata	freshwater	aquatic	animalia		actinopterygii	salmoniformes	salmonidae
2020	A multi-omics concentration-response framework uncovers novel understanding of triclosan effects in the chlorophyte Scenedesmus vacuolatus	multi_omics	tr_me	scenedesmus_vacuolatus	triclosan	chlorophyta	multiple	multiple	plantae		chlorophyceae	sphaeropleales	scenedesmaceae
2017	A multi-omic approach to elucidate low-dose effects of xenobiotics in zebrafish (Danio rerio) larvae	multi_omics	tr_me	Danio_rerio	APAP, DH, CBZ, FLX	chordata	freshwater	aquatic	animalia		actinopterygii	cypriniformes	cyprinidae
2020	Transcriptional responses in newly-hatched Japanese medaka (Oryzias latipes) associated with developmental malformations following diluted bitumen exposure	transcriptomics		Oryzias_latipes	bitumen	chordata	freshwater	aquatic	animalia		actinopterygii	beloniformes	adrianichthyidae
2020	Energy metabolism responses in muscle tissue of rainbow trout Oncorhynchus mykiss fry to CO2-induced aquatic acidification based on metabolomics	metabolomics		catostomus_commersonii	CO2	chordata	freshwater	aquatic	animalia		actinopterygii	cypriniformes	catostomidae
2017	Energy metabolism and metabolomics response of Pacific white shrimp Litopenaeus vannamei to sulfide toxicity	metabolomics		litopenaeus_vannamei	sulfide	arthropod	marine	aquatic	animalia		malacostraca	decapoda	penaeidae
2010	Impacts of an anti-androgen and anandrogen/anti-androgen mixture on the metabolite profile of male fathead minnowurine	metabolomics		pimephales_promelas	cyproterone_acetate, 17beta-trenbolone	chordata	freshwater	aquatic	animalia		actinopterygii	cypriniformes	cyprinidae
2016	Metabolite profiles of repeatedly sampled uring from male fathead minnows (Pimephales promelas) contain unique lipid signatures following exposure to anti-androgens	metabolomics		pimephales_promelas	vinclozolin, flutamide	chordata	freshwater	aquatic	animalia		actinopterygii	cypriniformes	cyprinidae
2016	Molecular impacts of perfluorinated chemicals (PFASs) in the liver and testis of male largemouth bass (Micropterus salmoides) in Minnesota Lakes	transcriptomics		Micropterus_salmoides	PFASs	chordata	freshwater	aquatic	animalia		actinopterygii	perciformes	centrarchidae
2016	High contaminant loads in Lake Apopka’s riparian wetland disrupt gene networks involved in reproduction and immune function in largemouth bass	transcriptomics		Micropterus_salmoides	DDE, methoxychlor	chordata	freshwater	aquatic	animalia		actinopterygii	perciformes	centrarchidae
2016	Time course of hepatic gene expression and plasma vitellogenin protein concentrations in estrone-exposed juvenile rainbow trout (Oncorhynchus mykiss)	transcriptomics		Oncorhynchus_mykiss	estrone	chordata	freshwater	aquatic	animalia		actinopterygii	salmoniformes	salmonidae
2016	Hepatic gene expression profiling in zebrafish (Danio rerio) exposed to the fungicide chlorothalonil	transcriptomics		Danio_rerio	chlorothalonil	chordata	freshwater	aquatic	animalia		actinopterygii	cypriniformes	cyprinidae
2016	Transcriptome profiling analysis of rare minnow (Gobiocypris rarus) gills after waterborne cadmium exposure	transcriptomics		gobiocypris_rarus	cadmium	chordata	freshwater	aquatic	animalia		actinopterygii	cypriniformes	cyprinidae
2013	Proteomic analysis of the reproductive organs of the hermaphroditic gastropod Lymnaea stagnalis exposed to different endocrine disrupting chemicals	proteomics		lymnaea_stagnalis	chlordecone, tributyltin	mollusca	freshwater	aquatic	animalia		gastropoda	basommatophora	lymnaeidae
2020	Multifactorial analysis of enviornmental metabolomic data in ecotoxicology: wild marine mussel exposed to WWTP Effluent as a Case Study	metabolomics		Mytilus_galloprovincialis	mixture	mollusca	marine	aquatic	animalia		bivalvia	mytilida	mytilidae
2019	Environmental transcriptomes of invasive dreissena, a model species in ecotoxicology and invasion biology	transcriptomics		dreissena_polymorpha	mixture	mollusca	freshwater	aquatic	animalia		bivalvia	myida	dreissenidae
2018	H-1 NMR-based metabolomics reveals interactive effects between the carrier solvent methanol and a pharmaceutical mixture in an amphibian developmental bioassay with Limnodynastes peronii	metabolomics		limnodynastes_peronii	mixture	chordata	freshwater	aquatic	animalia		amphibia	anura	limnodynastidae
2018	Physiological effects caused by microcystin-producing and nonmicrocystin producing Microcystis aeruginosa on medaka fish: A proteomic and metabolomic study on liver	multi_omics	pr_me	Oryzias_latipes	microcystin	chordata	freshwater	aquatic	animalia		actinopterygii	beloniformes	adrianichthyidae
2017	Global metabolome changes induced by cyanobacterial blooms in three representative fish species	metabolomics		perca_fluviatilis	microcystin	chordata	freshwater	aquatic	animalia		actinopterygii	perciformes	percidae
2017	Global metabolome changes induced by cyanobacterial blooms in three representative fish species	metabolomics		rutilus_rutilus	microcystin	chordata	freshwater	aquatic	animalia		actinopterygii	cypriniformes	cyprinidae
2017	Global metabolome changes induced by cyanobacterial blooms in three representative fish species	metabolomics		carassius_carassius	microcystin	chordata	freshwater	aquatic	animalia		actinopterygii	cypriniformes	cyprinidae
2016	Combined Transcirptomic and Proteomic approach to identify toxicity pathways in early life stages of japanese medaka (Oryzias latipes) exposed to 1,2,5,6-tetrabromocyclooctane (TBCO)	multi_omics		Oryzias_latipes	TBCO	chordata	freshwater	aquatic	animalia		actinopterygii	beloniformes	adrianichthyidae
2014	Mechanisms of toxicity of hydroxylated polybrominated diphenyl ethers (HO-PBDEs) determined by toxicogenomic analysis with a live cell array coupled with mutagenesis in Escherichia coli	multi_omics	tr_pr	escherichia_coli	HO-PBDEs	protobacteria	multiple	multiple	bacteria		gammaproteobacteria	enterobacterales	enterobacteriaceae
2009	Comparative functional genomic analysis identifies distinct and overlapping sets of genes required for resistance to monomethylarsonous acid (MMAIII) and arsenite (AsIII) in yeast	transcriptomics		escherichia_coli	MMAIII, AsIII	protobacteria	multiple	multiple	bacteria		gammaproteobacteria	enterobacterales	enterobacteriaceae
2012	Concentration-response concept in ecotoxicoproteomics: effects of different phenanthrene concentrations to the zebrafish (Danio rerio)	proteomics		Danio_rerio	phenanthrene	chordata	freshwater	aquatic	animalia		actinopterygii	cypriniformes	cyprinidae
2018	Metabolomics discovers early-response metabolic biomarkers that can predict chronic reproductive fitness in individual daphnia magna	metabolomics		daphnia_magna	cadmium, 24-dinitrophenol, propranolol	arthropod	freshwater	aquatic	animalia		branchiopoda	cladocera	daphniidae
2017	Metabolomic and proteomic investigation of impacts of titanium dioxide nanoparticles on Escherichia coli	multi_omics		escherichia_coli	titanium dioxide nanoparticles	protobacteria	multiple	multiple	bacteria		gammaproteobacteria	enterobacterales	enterobacteriaceae
2016	Predicting chronic copper and nickel reproductive toxicity in Daphnia pulex-pulicaria from whole-animal metabolic profiles	metabolomics		daphnia_magna	nickel	arthropod	freshwater	aquatic	animalia		branchiopoda	cladocera	daphniidae
2013	Transcriptional responses indicate attenuated oxidative stress in the springtail Folsomia candida exposed to mixtures of cadmium and phenanthrene	transcriptomics		folsomia_candida	cadmium, phenanthrene	arthropod	soil	terrestrial	animalia		entognatha	collembola	isotomidae
2012	Pyrosequencing-based transcriptomic resources in the pond snail Lymnaea stagnalis, with a focus on genes involved in molecular response to diquat-induced stress	transcriptomics		lymnaea_stagnalis	diquat	mollusca	freshwater	aquatic	animalia		gastropoda	basammotophora	lymnaeidae
2010	Discriminating between different acute chemical toxicities via changes in the daphnid metabolome	metabolomics		daphnia_magna	cadmium, fenvalerate, dinitrophenol, propranolol	arthropod	freshwater	aquatic	animalia		branchiopoda	cladocera	daphniidae
2010	Anchoring metabolic changes to phenotypic effects in the chlorophyte Scenedesmus vacuolatus under chemical exposure	metabolomics		scenedesmus_vacuolatus	PNA	chlorophyta	multiple	multiple	plantae		chlorophyceae	sphaeropleales	scenedesmaceae
2007	Metabolic profile biomarkers of metal contamination in a sentinel terrestrial species are applicable across multiple sites	metabolomics		lumbricus_rubellus	mixture	annelid	soil	terrestrial	animalia		clitellata	opisthopora	lumbricidae
2013	Toxicogenomic responses of zebrafish embryos/larvae to tris(1,3-dichloro-2-propyl) phosphate (TDCPP) reveal possible molecular mechanisms of developmental toxicitiy	transcriptomics		Danio_rerio	TDCPP	chordata	freshwater	aquatic	animalia		actinopterygii	cypriniformes	cyprinidae
2015	Gender differences in response in Gammarus pulex exposed to BDE-47: A gel-free proteomic approach	proteomics		gammarus_pulex	BDE-47	arthropod	freshwater	aquatic	animalia		malacostraca	amphipoda	gammaridae
2017	Transcriptional and cellular effects of benzotriazole UV stabilizers UV-234 and UV-328 in the freshwater invertebrates Chlamydomonas reinhardtii and Daphnia magna	transcriptomics		daphnia_magna	benzotriazole UV stabilizers UV-234 and UV-328	arthropod	freshwater	aquatic	animalia		branchiopoda	cladocera	daphniidae
2017	Transcriptional and cellular effects of benzotriazole UV stabilizers UV-234 and UV-328 in the freshwater invertebrates Chlamydomonas reinhardtii and Daphnia magna	transcriptomics		chlamydomonas reinhardtii	benzotriazole UV stabilizers UV-234 and UV-328	chlorophyta	freshwater	aquatic	plantae		chlorophyceae	chlamydomonadales	chlamydomonadaceae
2014	ITRAQ-based quantitative proteomic analyses on the gender-specific responses in mussel Mytilus galloprovincialis to tetrabromobisphenol	proteomics		Mytilus_galloprovincialis	tetrabromobisphenol	mollusca	marine	aquatic	animalia		bivalvia	mytilida	mytilidae
2016	An integrated proteomic and metabolomic study on the gender-specific responses of mussels Mytilus galloprovincialis to tetrabromobisphenol A (TBBPA)	multi_omics	pr_me	Mytilus_galloprovincialis	TBBPA	mollusca	marine	aquatic	animalia		bivalvia	mytilida	mytilidae
2008	Gender-specific proteomic responses in zebrafish liver following exposure to a selected mixture of brominated flame retardants	proteomics		Danio_rerio	brominated flame retardants	chordata	freshwater	aquatic	animalia		actinopterygii	cypriniformes	cyprinidae
2019	Transcriptome analysis reveals benzotriazole ultraviolet stabilizers regulate networks related to inflammation in juvenile zebrafish (Danio rerio)	transcriptomics		Danio_rerio	benzotriazole	chordata	freshwater	aquatic	animalia		actinopterygii	cypriniformes	cyprinidae
2020	Elucidating mechanisms of immunotoxicity by benzotriazole ultraviolet stabilizers in zebrafish (Danio rerio): implication of the AHR-IL17/IL22 immune pathway	transcriptomics		Danio_rerio	benzotriazole	chordata	freshwater	aquatic	animalia		actinopterygii	cypriniformes	cyprinidae
2016	Brain quantitative proteomic responses reveal new insight of benzotriazole neurotoxicity in female Chinese rare minnow (Gobiocypris rarus)	proteomics		gobiocypris_rarus	benzotriazole	chordata	freshwater	aquatic	animalia		actinopterygii	cypriniformes	cyprinidae
2019	Differential biological effects in two pedigrees of clam Ruditapes philippinarum exposed to cadmium using iTRAQ-based proteomics	proteomics		ruditapes_philippinarum	cadmium	mollusca	marine	aquatic	animalia		bivalvia	venerida	veneridae
2017	Differential effects of bisphenol A toxicity on oyster (/Crassostrea angulata) gonads as revealed by label-free quantitative proteomics	proteomics		Crassostrea_angulata	bisphenol A	mollusca	marine	aquatic	animalia		bivalvia	ostreida	ostreidae
2019	First evidence of protein modulation by polystyrene microplastics in a freshwater biological model	proteomics		dreissena_polymorpha	microplastic	mollusca	freshwater	aquatic	animalia		bivalvia	myida	dreissenidae
2019	Label-free and iTRAQ proteomics analysis in the liver of zebrafish (Danio rerio) following dietary exposure to the organochlorine pesticide dieldrin	proteomics		Danio_rerio	dieldrin	chordata	freshwater	aquatic	animalia		actinopterygii	cypriniformes	cyprinidae
2016	Proteomic analysis of zebrafish brain following chronically exposed to bisphenol A	proteomics		Danio_rerio	bisphenol A	chordata	freshwater	aquatic	animalia		actinopterygii	cypriniformes	cyprinidae
2019	Transgenerational proteome plasticity in resilience of a marine copepod in response to environmentally relevant concentrations of microplastics	proteomics		tigriopus_japonicus	microplastic	arthropod	marine	aquatic	animalia		hexanauplia	harpacticoida	harpacticidae
2010	A proteomics based approach to assessing the toxicity of bisphenol A and diallyl phthalate to the abalone (Haliotis diversicolor supertexta)	proteomics		haliotis_diversicolor_supertexta	bisphenol A	mollusca	marine	aquatic	animalia		gastropoda	vetigastropoda	haliotidae
2020	Ecotoxicological effects of erythromycin on a multispecies biofilm model, revealed by metagenomic and metabolomic approaches	metabolomics		bacterial_community	erythromycin	bac_community	multiple	multiple	NA		NA	NA	NA
2020	Omics approaches for conservation biology research on the bivalve Chamelea gallina	transcriptomics		chamaelea_gallina	mixture	mollusca	marine	aquatic	animalia		bivalvia	venerida	veneridae
2006	The cellular response to heat stress in the goy Gillichthys mirabilis: a cDNA microarra and protein-level analysis	multi_omics	tr_pr	gillichthys_mirabilis	temperature	chordata	marine	aquatic	animalia		actinopterygii	gobiiformes	oxudercidae
2010	Serial analysis of gene expression in the skeletal muscles of zebrafish fed with a methylmercury-contaminated diet	transcriptomics		Danio_rerio	methylmercury	chordata	freshwater	aquatic	animalia		actinopterygii	cypriniformes	cyprinidae
2012	Effects of dietary methylmercury on the zebrafish brain: histological, mitochondrial and gene transcription analyses	transcriptomics		Danio_rerio	methylmercury	chordata	freshwater	aquatic	animalia		actinopterygii	cypriniformes	cyprinidae
2008	Hepatic gene expression profiles of European flunder (Platichthys flesus) from field sites and computational approaches to predict site from stress gene responses following exposure to model toxicants	transcriptomics		Platichthys_flesus	cadmium, 3-methylcholanthrene, aroclor, tert-butyl-hydroperoxide, lindane, perfluorooctanoic acid	chordata	marine	aquatic	animalia		actinopterygii	pleuronectiformes	pleuronectidae
2012	RNA-seq reveals complex genetic response to deepwater horizon oil release in Fundulus grandis	transcriptomics		Fundulus_grandis	oil	chordata	marine	aquatic	animalia		actinopterygii	cyprinodontiformes	fundulidae
2014	Response of detoxification gene mRNA expression and selection of molecular biomarkers in the clam Ruditapes philippinarum exposed to benzo[a]pyrene	transcriptomics		ruditapes_philippinarum	benzo(a)pyrene	mollusca	marine	aquatic	animalia		bivalvia	venerida	veneridae
2013	Impact of benzo(a)pyrene, Cu and their mixture on the proteomic response of Mytilus galloprovincialis	proteomics		Mytilus_galloprovincialis	benzo(a)pyrene, copper	mollusca	marine	aquatic	animalia		bivalvia	mytilida	mytilidae
2007	Vitellogenin cleavage products as indicators for toxic stress in zebra fish embryos: A proteomic approach	proteomics		Danio_rerio	ethanol	chordata	freshwater	aquatic	animalia		actinopterygii	cypriniformes	cyprinidae
2009	Protein profiles in zebrafish (Danio rerio) embryos exposed to perfluorooctane sulfonate	proteomics		Danio_rerio	perfluorooctane sulfonate	chordata	freshwater	aquatic	animalia		actinopterygii	cypriniformes	cyprinidae
2009	Proteomic study of the effects of microcystin-LR on organelle and membrane proteins in medaka fish liver	proteomics		Oryzias_latipes	microcystin-LR	chordata	freshwater	aquatic	animalia		actinopterygii	beloniformes	adrianichthyidae
2002	A proteomic approach to the study of the marine mussels Mytilus edulis and M. Galloprovincialis	proteomics		Mytilus_galloprovincialis	none	mollusca	marine	aquatic	animalia		bivalvia	mytilida	mytilidae
2002	A proteomic approach to the study of the marine mussels Mytilus edulis and M. Galloprovincialis	proteomics		mytilus_edulis	none	mollusca	marine	aquatic	animalia		bivalvia	mytilida	mytilidae
2014	Transcriptioinal expression levels and biochemical markers of oxidative stress in Mytilus galloprovincialis exposed to nickel and heat stress	transcriptomics		Mytilus_galloprovincialis	temperature, nickel	mollusca	marine	aquatic	animalia		bivalvia	mytilida	mytilidae
2019	Investigating a Transcriptomic Approach on Marine Mussel Hemocytes Exposed to Carbon Nanofibers: An In Vitro/In Vivo Comparison	transcriptomics		mytilus_edulis	carbon nanofibers	mollusca	marine	aquatic	animalia		bivalvia	mytilida	mytilidae
2011	The organophosphate chlorpyrifos interferes with the responses to 17ß-estradiol in the digestive gland of the marine mussel Mytilus galloprovincialis	transcriptomics		Mytilus_galloprovincialis	17alpha-Ethinylestradiol	mollusca	marine	aquatic	animalia		bivalvia	mytilida	mytilidae
2020	The susceptibility of Lymantria dispar larvae to Beauveria bassiana under Cd stress: A multi-omics study	multi_omics	tr_pr	Beauveria_bassiana	cadmium	ascomycota	soil	terrestrial	fungi		sordariomycetes	hypocreales	cordycipitaceae
2020	Metabolomic Responses of Green Alga Chlamydomonas reinhardtii Exposed to Sublethal Concentrations of Inorganic and Methylmercury	metabolomics		chlamydomonas_reinhardtii	methylmercury	chlorophyta	freshwater	aquatic	plantae		chlorophyceae	chlamydomonadales	chlamydomonadaceae
2020	Effects of butyl benzyl phthalate exposure on Daphnia magna growth, reproduction, embryonic development and transcriptomic responses	transcriptomics		daphnia_magna	butyl benzyl phthalate	arthropod	freshwater	aquatic	animalia		branchiopoda	cladocera	daphniidae
2020	Integrated transcriptomics and metabolomics analyses reveal benzo [a] pyrene enhances the toxicity of mercury to the Manila clam, Ruditapes philippinarum	multi_omics	tr_me	ruditapes_philippinarum	mercury	mollusca	marine	aquatic	animalia		bivalvia	venerida	veneridae
2018	An integrative omics approach to unravel toxicity mechanisms of environmental chemicals: effects of a formulated herbicide	multi_omics	tr_pr	folsomia_candida	glyphosate	arthropod	soil	terrestrial	animalia		entognatha	NA	isotomidae
2018	Transcriptomic and microRNAomic profiling reveals molecular mechanisms to cope with silver nanoparticle exposure in the ciliate Euplotes vannus	transcriptomics		Euplotes_vannus	silver nanoparticles	ciliophora	marine	aquatic	animalia		spirotrichea	euplotida	euplotidae
2020	Multi-omics analyses reveal molecular mechanisms for the antagonistic toxicity of carbon nanotubes and ciprofloxacin to Escherichia coli	multi_omics	tr_me	escherichia_coli	carbon nanotubes, ciprofloxacin	protobacteria	multiple	multiple	bacteria		gammaproteobacteria	enterobacteralse	enterobacteriaceae
2020	The Zebra Mussel (Dreissena polymorpha) as a Model Organism for Ecotoxicological Studies: A prior 1H NMR Spectrum Interpretation of a Whole Body Extract for Metabolism Monitoring	metabolomics		dreissena_polymorpha	none	mollusca	freshwater	aquatic	animalia		bivalvia	myida	dreissenidae
2020	Integration of transcriptomics and metabolomics reveals the responses of earthworms to the long-term exposure of TiO2 nanoparticles in soil	multi_omics	tr_me	eisenia_fetida	titanium dioxide nanoparticles	annelid	soil	terrestrial	animalia		clitellata	opisthopora	lumbricidae
2006	Gene transcription profiling in pollutant exposed mussels (Mytilus spp.) using a new low-density oligonucleotide microarray	transcriptomics		mytilus_spp	mercury	mollusca	freshwater	aquatic	animalia		bivalvia	mytilida	mytilidae
2009	Assessment of Donana National Park contamination in Procambarus clarkii: Integration of conventional biomarkers and proteomic approaches	proteomics		procambarus_clarkii	mixture	arthropod	freshwater	aquatic	animalia		malacostraca	decapoda	cambaridae
2017	Proteomic response of Macrobrachium rosenbergii hepatopancreas exposed to chlordecone: Identification of endocrine disruption biomarkers?	proteomics		macrobrachium_rosenbergii	chlordecone	arthropod	freshwater	aquatic	animalia		malacostraca	decapoda	palaemonidae
2014	A proteomic evaluation of the effects of the pharmaceuticals diclofenac and gemfibrozil on marine mussels (Mytilus spp.): Evidence for chronic sublethal on stress-response proteins	proteomics		mytilus_spp	diclofenac, gemfibrozil	mollusca	marine	aquatic	animalia		bivalvia	mytilida	mytilidae
2015	The response of Phaeodactylum tricornotum to quantum dot exposure: Acclimation and changes in protein expression	proteomics		phaeodactylum_tricornutum	quantum dot	ochrophyta	marine	aquatic	plantae		bacillariophyceae	bacillariales	phaeodactylaceae
2019	Proteomic profile of the hard corona of charged polysterene nanoparticles exposed to sea urchin Paracentrotus lividus coelomic fluid highlights potential drivers of toxicity	proteomics		paracentrotus_lividus	polysterene	echinodermata	marine	aquatic	animalia		echinoidea	camarodonta	parechinidae
2015	Itraq-based proteomics analysis of citrate gold nanoparticle exposure effects in the marine clam Ruditapes phillipinarum	proteomics		ruditapes_philippinarum	gold nanoparticles	mollusca	marine	aquatic	animalia		bivalvia	venerida	veneridae
2016	Statistcal modeling of proteome expression data in Manila clam, Ruditapes philipinarum, exposed to citrate capped gold nanoparticles (AuNP), as a model contaminant of environmental nanoparticle contamination	proteomics		ruditapes_philippinarum	gold nanoparticles	mollusca	marine	aquatic	animalia		bivalvia	venerida	veneridae
2013	Differential protein expression in mussels Mytilus galloprovincialis exposed to nano and ionic Ag	proteomics		Mytilus_galloprovincialis	silver nanoparticles	mollusca	marine	aquatic	animalia		bivalvia	mytilida	mytilidae
2018	Role of endocytotic uptake routes in impacting the ROS-related toxicity of silver nanoparticles to Mytilus galloprovincialis: A redox proteomic investigation	proteomics		Mytilus_galloprovincialis	silver nanoparticles	mollusca	marine	aquatic	animalia		bivalvia	mytilida	mytilidae
2019	Changes in protein expression in mussels Mytilus galloprovincialis dietarily exposed to PVP/PEI coated silver nanoparticles at different seasons	proteomics		Mytilus_galloprovincialis	silver nanoparticles	mollusca	marine	aquatic	animalia		bivalvia	mytilida	mytilidae
2014	Proteomic response of mussels Mytilus galloprovincialis exposed to CuO NPs and CU2+: An exploratory biomarker discovery	proteomics		Mytilus_galloprovincialis	copper	mollusca	marine	aquatic	animalia		bivalvia	mytilida	mytilidae
2011	A proteomic study using zebra mussels (D. Polymorpha) exposed to benzo(a)pyrene: The role of gender and exposure concentrations	proteomics		dreissena_polymorpha	benzo(a)pyrene	mollusca	freshwater	aquatic	animalia		bivalvia	myida	dreissenidae
2017	Multiplexed assay for protein quantification in the invertebrate Gammarus fossarum by liquid chromatography coupled to tandem mass spectrometry	proteomics		gammarus_fossarum	none	arthropod	freshwater	aquatic	animalia		malacostraca	amphipoda	gammaridae
2020	High-multiplexed monitoring of protein biomarkers in the sentinel Gammarus fossarum by targeted scout-MRM assay, a new vision for ecotoxicoproteomics	proteomics		gammarus_fossarum	none	arthropod	freshwater	aquatic	animalia		malacostraca	amphipoda	gammaridae
2006	The potential of ecotoxicoproteomics in environmental monitoring: biomarker profiling in mussel plasma using ProteinChip array technology	proteomics		mytilus_edulis	oil	mollusca	marine	aquatic	animalia		bivalvia	mytilida	mytilidae
2018	Proteomic profile and toxicity pathway analysis in zebrafish embryos exposed to bisphenol A and di-n-butyl-phthalate at environmentally relevant levels	proteomics		Danio_rerio	bisphenol A	chordata	freshwater	aquatic	animalia		actinopterygii	cypriniformes	cyprinidae
2006	An ecotoxicoproteomic approach (SELDI-TOF mass spectrometry) to biomarker discovery in crab exposed to pollutants under laboratory conditions	proteomics		hyas_araneus	diallyl phatalate, bisphenol A, polybrominated diphenyl ether, oil, alkylphenol, 4-nonylphenol	arthropod	marine	aquatic	animalia		malacostraca	decapoda	oregoniidae
2009	Proteomic studies in zebrafish liver cells exposed to the brominated flame retardants HBCD and TBBPA	proteomics		Danio_rerio	HBCD, TBBPA	chordata	freshwater	aquatic	animalia		actinopterygii	cypriniformes	cyprinidae
2017	Histopathological and proteomic responses in male Chinese rare minnow (gobiocypris rarus) indicate hepatoxicity following benzotriazole exposure	proteomics		gobiocypris_rarus	benzotriazole	chordata	freshwater	aquatic	animalia		actinopterygii	cypriniformes	cyprinidae
2016	Proteomics analysis of zebrafish brain following chronically exposed to bisphenol A	proteomics		Danio_rerio	bisphenol A	chordata	freshwater	aquatic	animalia		actinopterygii	cypriniformes	cyprinidae
2019	Molecular signalling pathways elicited by 17a-ethinylestradiol in Japanese medaka male larvae undergoing gonadal differentiation	transcriptomics		Oryzias_latipes	17alpha-Ethinylestradiol	chordata	freshwater	aquatic	animalia		actinopterygii	beloniformes	adrianichthyidae
2019	Transcriptomic analysis of the impacts of ethinylestradiol (EE2) and its consequences for proliferative kidney disease outcome in rainbow trout (Oncorhynchus mykiss)	transcriptomics		Oncorhynchus_mykiss	ethinylestradiol	chordata	freshwater	aquatic	animalia		actinopterygii	salmoniformes	salmonidae
2010	An integrated transcriptomic and proteomic approach characterizing estrogenic and metabolic effects of 17 a-ethinylestradiol in zebrafish (Danio rerio)	multi_omics	tr_pr	Danio_rerio	17alpha-Ethinylestradiol	chordata	freshwater	aquatic	animalia		actinopterygii	cypriniformes	cyprinidae
2016	Molecular initiating events of the intersex phenotype: low-dose exposure to 17alpha-ethinylestradiol rapidly regulates molecular networks associated with gonad differentiation in the adult fathead minnow testis	transcriptomics		pimephales_promelas	17alpha-Ethinylestradiol	chordata	freshwater	aquatic	animalia		actinopterygii	cypriniformes	cyprinidae
2009	Gene expression responses in male fathead minnows exposed to binary mixtures of an estrogen and antiestrogen	transcriptomics		pimephales_promelas	17alpha-Ethinylestradiol, ZM	chordata	freshwater	aquatic	animalia		actinopterygii	cypriniformes	cyprinidae
2007	Sensitive and robust gene expression changes in fish exposed to estrogen-a microarray approach	transcriptomics		Oncorhynchus_mykiss	ethinyl-estradiol	chordata	freshwater	aquatic	animalia		actinopterygii	salmoniformes	salmonidae
2013	High-throughput sequencing and pathway analysis reveal alteration of the pituitary transcriptome by 17a-ethynylestradiol (EE2) in female coho salmon, Oncorhynchus kisutch	transcriptomics		oncorhynchus_kisutch	17alpha-Ethinylestradiol	chordata	freshwater	aquatic	animalia		actinopterygii	salmoniformes	salmonidae
2012	Gene expression profiles in the testis associated with testis-ova in adult Japanese medaka (Oryziaslatipes) exposed to 17a-ethinylestradiol	transcriptomics		Oryzias_latipes	17alpha-Ethinylestradiol	chordata	freshwater	aquatic	animalia		actinopterygii	beloniformes	adrianichthyidae
2018	Systems analysis of the liver transcriptome in adult zebrafish exposed to the plasticizer (2-ethylhexyl) phthalate (DEHP)	transcriptomics		Danio_rerio	DEHP	chordata	freshwater	aquatic	animalia		actinopterygii	cypriniformes	cyprinidae
2015	17alpha-Ethinylestradiol (EE2) effect on global gene expression in primary rainbow trout (Oncorhynchus mykiss) hepatocytes	transcriptomics		Oncorhynchus_mykiss	17alpha-Ethinylestradiol	chordata	freshwater	aquatic	animalia		actinopterygii	salmoniformes	salmonidae
2010	Hepatic transcriptomic and metabolomic responses in the Stickleback (Gasterosteus aculeatus) exposed to ethinyl-estradiol	multi_omics	tr_me	Gasterosteus_aculeatus	ethinyl-estradiol	chordata	both	aquatic	animalia		actinopterygii	gasterosteiformes	gasterosteidae
2015	RNA-Seq-based transcriptome analysis of Korean rose bitterling (Rhodeus uyekii) exposed to synthetic estrogen 17-alpha-ethinylestradiol (EE2)	transcriptomics		rhodeus_uyekii	17alpha-Ethinylestradiol	chordata	freshwater	aquatic	animalia		actinopterygii	cypriniformes	cyprinidae
2007	Microarray analysis in the zebrafish (Danio rerio) liver and telencephalon after exposure to low concentration of 17alpha-ethinylestradiol	transcriptomics		Danio_rerio	17alpha-Ethinylestradiol	chordata	freshwater	aquatic	animalia		actinopterygii	cypriniformes	cyprinidae
2006	Gene expression profiling in the neuroendocrine brain of male goldfish (Carassius auratus) exposed to 17alpha-ethinylestradiol	transcriptomics		carassius_auratus	17alpha-Ethinylestradiol	chordata	freshwater	aquatic	animalia		actinopterygii	cypriniformes	cyprinidae
2006	Expression profiling of endocrine-disrupting compounds using a customized Cyprinus carpio cDNA microarray	transcriptomics		Cyprinus_carpio	17alpha-Ethinylestradiol, 17beta-estradiol, 4-nonylphenol, bisphenol A, tamoxifen, 17alpha-methyltestosterone, 11-ketotestosterone, dibutyl phthalate, flutamide, vinclozolin, hydrocortisone, copper, propylthiouracil	chordata	freshwater	aquatic	animalia		actinopterygii	cypriniformes	cyprinidae
2018	Testis transcriptome alterations in zebrafish (Danio rerio) with reduced fertility due to developmental exposure to 17a-ethinyl estradiol	transcriptomics		Danio_rerio	17alpha-Ethinylestradiol	chordata	freshwater	aquatic	animalia		actinopterygii	cypriniformes	cyprinidae
2017	Persistent effects of developmental exposure to 17a-ethinylestradiol on the zebrafish (Danio rerio) brain transcriptome and behavior	transcriptomics		Danio_rerio	17alpha-Ethinylestradiol	chordata	freshwater	aquatic	animalia		actinopterygii	cypriniformes	cyprinidae
2016	Microarray analysis of di-n-butyl phthalate and 17alpha ethinyl-oes-tradiol responses in three-spined stickleback testes reveals novel candidate genes for endocrine disruption	transcriptomics		Gasterosteus_aculeatus	17alpha-Ethinylestradiol	chordata	both	aquatic	animalia		actinopterygii	gasterosteiformes	gasterosteidae
2019	Transcriptomic analysis of short-term 17a-ethynylestradiol exposure in two Californian sentinel fish species sardine (Sardinops sagax) and mackerel (Scomber japonicus)	transcriptomics		sardinops_sagax	17alpha-Ethinylestradiol	chordata	marine	aquatic	animalia		actinopterygii	clupeiformes	clupeidae
2019	Transcriptomic analysis of short-term 17a-ethynylestradiol exposure in two Californian sentinel fish species sardine (Sardinops sagax) and mackerel (Scomber japonicus)	transcriptomics		scomber_japonicus	17alpha-Ethinylestradiol	chordata	marine	aquatic	animalia		actinopterygii	scombriformes	scombridae
2015	The effects of synthetic estrogen exposure on the sexually dimorphic liver transcriptome of the sex-role-reversed Gulf pipefish	transcriptomics		syngnathus_scovelli	17alpha-Ethinylestradiol	chordata	marine	aquatic	animalia		actinopterygii	syngnathiformes	syngnathidae
2017	characterisation of the transcriptome of male and female wild-type guppy brains with RNA-Seq and consequences of exposure to the pharmaceutical pollutant, 17a-ethinyl estradiol	transcriptomics		poeciliidae_reticulata	17alpha-Ethinylestradiol	chordata	freshwater	aquatic	animalia		actinopterygii	cyprinodontiformes	poeciliidae
2007	Gonadal transcriptome responses and physiological consequences of exposure to oestrogen in breeding zebrafish (Danio rerio)	transcriptomics		Danio_rerio	17alpha-Ethinylestradiol	chordata	freshwater	aquatic	animalia		actinopterygii	cypriniformes	cyprinidae
2013	Transcriptome alterations in zebrafish embryos after exposure to environmental estrogens and anti-estrogens can reveal endocrine disruption	transcriptomics		Danio_rerio	17alpha-Ethinylestradiol, flutamide	chordata	freshwater	aquatic	animalia		actinopterygii	cypriniformes	cyprinidae
2006	Dynamics of 17alpha-ethynylestradiol exposure in rainbow trout (Oncorhynchus mykiss): absorption, tissue distribution, and hepatic gene expression pattern	transcriptomics		Oncorhynchus_mykiss	17alpha-Ethinylestradiol	chordata	marine	aquatic	animalia		actinopterygii	salmoniformes	salmonidae
2015	Early exposure of 17alpha-ethynylestradiol and diethyl-stilbestrol induces morphological changes and alters ovarion steroidgenic pathway enzyme gene expression in catfish, Clarias garepinus	transcriptomics		clarias_gariepinus	17alpha-Ethinylestradiol	chordata	freshwater	aquatic	animalia		actinopterygii	siluriformes	clariidae
2017	Hepatic transcriptioinal responses to copper in the three-spined stickleback are affected by their pollution exposure history	transcriptomics		Gasterosteus_aculeatus	copper	chordata	both	aquatic	animalia		actinopterygii	gasterosteiformes	gasterosteidae
2018	RNA-Seq analysis of transcriptome responses in Atlantic cod (Gadus morhua) precision-cut liver slices exposed to benzo[a] pyrene and 17a-ethynylestradiol	transcriptomics		Gadus_morhua	benzo(a)pyrene	chordata	marine	aquatic	animalia		actinopterygii	gadiformes	gadidae
2018	RNA-Seq analysis of transcriptome responses in Atlantic cod (Gadus morhua) precision-cut liver slices exposed to benzo[a] pyrene and 17a-ethynylestradiol	transcriptomics		Gadus_morhua	17alpha-Ethinylestradiol	chordata	marine	aquatic	animalia		actinopterygii	gadiformes	gadidae
2019	A systems biology approach reveals neuronal and muscle developmental defects after chronic exposure to ionising radiation in zebrafish	multi_omics	tr_pr	Danio_rerio	radiation	chordata	freshwater	aquatic	animalia		actinopterygii	cypriniformes	cyprinidae
2018	Tissue-Based Mapping of the Fathead Minnow (Pimephales promelas) Transcriptome and Proteome	multi_omics	tr_pr	pimephales_promelas	tissue_atlas	chordata	freshwater	aquatic	animalia		actinopterygii	cypriniformes	cyprinidae
2019	From laboratory to the field: Validating molecular markers of effect in Folsomia candida exposed to a fungicide-based formulation	transcriptomics		folsomia_candida	chlorothalonil	annelid	soil	terrestrial	animalia		entognatha	collembola	isotomidae
2015	Transcriptome profile analysis reveals specific signatures of pollutants in Atlantic eels	transcriptomics		anguilla_rostrata	mixture	chordata	freshwater	aquatic	animalia		actinopterygii	anguilliformes	anguillidae
2008	Gene expression profiling in Daphnia magna part I: concentration-dependent profiles provide support for the No Observed Transcriptional Effect Level	transcriptomics		daphnia_magna	copper, cadmium, zinc	arthropod	freshwater	aquatic	animalia		branchiopoda	cladocera	daphniidae
2018	A reduced transcriptome approach to assess environmental toxicants using zebrafish embryo test	transcriptomics		Danio_rerio	none	chordata	freshwater	aquatic	animalia		branchiopoda	cladocera	daphniidae
2013	Transcriptomics and in vivo tests reveal novel mechanisms underlying endocrine disruption in an ecological sentinel, Nucella lapillus	transcriptomics		nucella_lapillus	tributyltin	mollusca	marine	aquatic	animalia		gastropoda	neogastropoda	muricidae
2014	Correlation of gene expression and contaminant concentrations in wild largescale suckers: A field-based study	transcriptomics		catostomus_macrocheilus	mixture	chordata	freshwater	aquatic	animalia		actinopterygii	cypriniformes	catostomidae
2013	Transcriptional responses of male fathead minnows exposed to oil sands process-affected water	transcriptomics		pimephales_promelas	oil	chordata	freshwater	aquatic	animalia		actinopterygii	cypriniformes	cyprinidae
2013	Concentration-response relationships and temporal patterns in hepatic gene expression of Chinook salmon (Oncorhynchus tshawytscha) exposed to sewage	transcriptomics		oncorhynchus_tshawytscha	mixture	chordata	marine	aquatic	animalia		actinopterygii	salmoniformes	salmonidae
2013	Gene expression of fathead minnows (Pimephales promelas) exposed to two types of treated municipal wastewater effluents	transcriptomics		pimephales_promelas	mixture	chordata	freshwater	aquatic	animalia		actinopterygii	cypriniformes	cyprinidae
2014	Molecular responses of European flounder (Platichthys flesus) chronically exposed to contaminated estuarine sediments	multi_omics	tr_me	Platichthys_flesus	mixture	chordata	freshwater	aquatic	animalia		actinopterygii	pleuronectiformes	pleuronectidae
2012	Taking microarrays to the field: Differential hepatic gene expression of caged fathead minnows from Nebraska watersheds	transcriptomics		pimephales_promelas	mixture	chordata	freshwater	aquatic	animalia		actinopterygii	cypriniformes	cyprinidae
2013	Gene transcription reflects poor health status of resident European eel chronically exposed to environmental pollutants	transcriptomics		anguilla_anguilla	mixture	chordata	freshwater	aquatic	animalia		actinopterygii	anguilliformes	anguillidae
2002	Application of genomics and proteomics for study of the integrated response to zinc exposure in a non-model fish species, the rainbow trout	multi_omics		Oncorhynchus_mykiss	zinc	chordata	freshwater	aquatic	animalia		actinopterygii	salmoniformes	salmonidae
2006	Acute toxicity profile of cadmium revealed by proteomics in brain tissue of Paralichthys olivaceus: Potential role of transferrin in cadmium toxicity	proteomics		Paralichthys_olivaceus	cadmium	chordata	marine	aquatic	animalia		actinopterygii	pleuronectiformes	paralichthyidae
2014	Looking for protein expression signatures in European eel peripheral blood mononuclear cells after in vivo exposure to perfluorooctane sulfonate and a real world field study	proteomics		anguilla_anguilla	perfluorooctane sulfonate	chordata	freshwater	aquatic	animalia		actinopterygii	anguilliformes	anguillidae
2012	Proteomic profiles of white sucker (Catostomus commersonii) sampled from within the Thunder Bay area of concern reveal up-regulation of proteins associated with tumor formation and exposure to environmental estrogens	proteomics		catostomus_commersonii	mixture	chordata	freshwater	aquatic	animalia		actinopterygii	cypriniformes	catostomidae
2008	Proteomic study of the effects of complex environmental stresses in the livers of goldfish (Carassius auratus) that inhabit Gaobeidian Lake in Beijing, China	proteomics		carassius_auratus	mixture	chordata	freshwater	aquatic	animalia		actinopterygii	cypriniformes	cyprinidae
2014	Proteome variance differences within populations of European whitefish (Coregonus lavaretus) originating from contrasting salinity environments	proteomics		coregonus_lavaretus	salinity	chordata	freshwater	aquatic	animalia		actinopterygii	salmoniformes	salmonidae
2012	Proteomic analysis of Sydney rock oysters (Saccostrea glomerata) exposed to metal contamination in the field	proteomics		saccostrea_glomerata	mixture	mollusca	marine	aquatic	animalia		bivalvia	ostreida	ostreidae
2006	Using NMR metabolomics to identify responses of an environmental estrogen in blood plasma of fish	metabolomics		Oncorhynchus_mykiss	ethinyl-estradiol	chordata	marine	aquatic	animalia		actinopterygii	salmoniformes	salmonidae
2011	Reproducible 1H NMR-based metabolomic responses in fish exposed to different sewage effluents in two separate studies	metabolomics		Oncorhynchus_mykiss	mixture	chordata	marine	aquatic	animalia		actinopterygii	salmoniformes	salmonidae
2008	Investigating compensation and recovery of fathead minnow (Pimephales promelas) exposed to 17a-ethynylestradiol with metabolite profiling	metabolomics		pimephales_promelas	17alpha-Ethinylestradiol	chordata	freshwater	aquatic	animalia		actinopterygii	cypriniformes	cyprinidae
2014	Effect of acute stresses on zebrafish (Danio rerio) metabolome measured by NMR-based metabolomics	metabolomics		Danio_rerio	multiple	chordata	freshwater	aquatic	animalia		actinopterygii	cypriniformes	cyprinidae
2010	Metabolic responses produced by crude versus dispersed oil in Chinook salmon pre-smolts via NMR-based metabolomics	metabolomics		oncorhynchus_tshawytscha	oil	chordata	marine	aquatic	animalia		actinopterygii	salmoniformes	salmonidae
2014	NMR-based metabolomics approach to study the toxicity of lambda-cyhalothrin to goldfish (Carassius auratus)	metabolomics		carassius_auratus	lambda-cyhalothrin	chordata	freshwater	aquatic	animalia		actinopterygii	cypriniformes	cyprinidae
2008	Changes in gene expression due to chronic exposure to environmental pollutants	transcriptomics		fundulus_heteroclitus	mixture	chordata	freshwater	aquatic	animalia		actinopterygii	cyprinodontiformes	fundulidae
2009	Site-specific impacts on gene expression and behavior in fathead minnows (Pimephales promelas) exposed in situ to streams adjacent to sewage treatment plants	transcriptomics		pimephales_promelas	mixture	chordata	freshwater	aquatic	animalia		actinopterygii	cypriniformes	cyprinidae
2008	Hepatic transcriptomic profiles of European flounder (Platichthys flesus) from field sites and computational approaches to predict site from stress gene responses following exposure to model toxicants	transcriptomics		Platichthys_flesus	cadmium, 3-methylcholanthrene, PCB, tert-butyl-hydroperoxide, lindane, perfluoro-octanoic acid	chordata	marine	aquatic	animalia		actinopterygii	pleuronectiformes	pleuronectidae
2013	Transcriptome sequencing and analysis of wild Amur ide (Leuciscus waleckii) inhabiting an extreme alkaline-saline lake reveals insights into stress adaptation	transcriptomics		leuciscus_waleckii	alkaline	chordata	freshwater	aquatic	animalia		actinopterygii	cypriniformes	cyprinidae
2012	Transcriptome profiles of Japanese medaka (Oryzias latipes) in response to alkalinity stress	transcriptomics		Oryzias_latipes	alkaline	chordata	freshwater	aquatic	animalia		actinopterygii	beloniformes	adrianichthyidae
2008	Gene expression profiles of fathead minnows exposed to surface waters above and below a sewage treatment plant in Minnesota	transcriptomics		pimephales_promelas	mixture	chordata	freshwater	aquatic	animalia		actinopterygii	cypriniformes	cyprinidae
2013	Hepatic transcriptome profiling indicates differential mRNA expression of apoptosis and immune related genes in eelpout (Zoarces viviparus) caught at Göteborg harbor, Sweden	transcriptomics		zoarces_viviparus	mixture	chordata	marine	aquatic	animalia		actinopterygii	perciformes	zoarcidae
2012	Surviving in a toxic world: Transcriptomics and gene expression profiling in response to environmental pollution in the critically endangered European eel	transcriptomics		anguilla_anguilla	mixture	chordata	freshwater	aquatic	animalia		actinopterygii	anguilliformes	anguillidae
2012	Using gene expression to assess the status of fish from anthropogenically influenced estuarine wetlands	transcriptomics		gillichthys_mirabilis	mixture	chordata	freshwater	aquatic	animalia		actinopterygii	gobiiformes	oxudercidae
2011	Effects of chronic metal exposure on wild fish populations revealed by high-throughput cDNA sequencing	transcriptomics		perca_flavescens	cadmium, copper	chordata	freshwater	aquatic	animalia		actinopterygii	perciformes	percidae
2013	Gene expression changes leading extreme alkaline tolerance in Amur ide (Leuciscus waleckii) inhabiting soda lake	transcriptomics		leuciscus_waleckii	alkaline	chordata	freshwater	aquatic	animalia		actinopterygii	cypriniformes	cyprinidae
2004	Coping with cold: An integrative, multitissue analysis of the transcriptome of a poikilothermic vertebrate	transcriptomics		Cyprinus_carpio	temperature	chordata	freshwater	aquatic	animalia		actinopterygii	cypriniformes	cyprinidae
2004	The effects of temperature reduction on gene expression and oxidative stress in skeletal muscle from adult zebrafish	transcriptomics		Danio_rerio	oxidative_stress	chordata	freshwater	aquatic	animalia		actinopterygii	cypriniformes	cyprinidae
2008	Gene expression analysis of collembola in cadmium containing soil	transcriptomics		folsomia_candida	cadmium	arthropod	soil	terrestrial	animalia		entognatha	collembola	isotomidae
2008	Microarray analysis reveals a mechanism of phenolic polybrominated diphenylether toxicity in zebrafish	transcriptomics		Danio_rerio	phenolic polybrominated diphenylether	chordata	freshwater	aquatic	animalia		actinopterygii	cypriniformes	cyprinidae
2020	Toxicological effects of microplastics in Litopenaeus vannamei as indicated by an integrated microbiome, proteomic and metabolomic approach	multi_omics	pr_me	litopenaeus_vannamei	microplastic	arthropod	marine	aquatic	animalia		malacostraca	decapoda	penaeidae
2020	Integrated transcriptome sequencing (RNA-seq) and proteomic studies reveal resource reallocation towards energy metabolism and defense in Skeletonema marinoi in response to co2 increase	multi_omics	tr_pr	skeletonema_marinoi	CO2	bacillariophyta	marine	aquatic	animalia		bacillariophyceae	thalassiosirales	skeletonemataceae
2020	Multi-omics analysis reveals the glycolipid metabolism response mechanism in the liver of genetically improved farmed Tilapia (GIFT, Oreochromis niloticus) under hypoxia stress	multi_omics	tr_me	oreochromis_niloticus	hypoxia	chordata	freshwater	aquatic	animalia		actinopterygii	cichliformes	cichlidae
2020	Integrative analyses of transcriptomics and metabolomics in Raphidocelis subcapitata treated with clarithromycin	multi_omics	tr_me	raphidocelis_subcapitata	clarithromycin	chlorophyta	freshwater	aquatic	plantae		chlorophyceae	sphaeropleales	selenastraceae
2020	Multi-omics analysis provides novel insight into immuno-physiological pathways and development of thermal resistance in rainbow trout exposed to acute thermal stress	multi_omics	tr_pr	Oncorhynchus_mykiss	temperature	chordata	marine	aquatic	animalia		actinopterygii	salmoniformes	salmonidae
2015	Integrative analyses reveal transcriptome-proteome correlation in biological pathways and secondary metabolism clusters in A. Flavus in response to temperature	multi_omics	tr_pr	aspergillus_flavus	temperature	ascomycota	multiple	terrestrial	fungi		eurotiomycetes	eurotiales	trichocomaceae
2020	Proteomic analysis of Aspergillus niger 3.316 under heat stress	proteomics		aspergillus_niger	temperature	ascomycota	multiple	terrestrial	fungi		eurotiomycetes	eurotiales	trichocomaceae
2016	Proteomic analysis of Mortierella isabellina M6-22 during cold stress	proteomics		mortierella_isabellina	temperature	zygomycota	soil	terrestrial	fungi		zygomycetes	mortierellales	mortierellaceae
2017	ITRAQ-based quantitative proteome revealed metabolic changes of Flammulina velutipes mycelia in response to cold stress	proteomics		flammulina_velutipes	temperature	basidiomycets	multiple	terrestrial	fungi		agariomycetes	agaricales	physalacriaceae
2016	Genomic, transcriptomic, and proteomic analysis provide insights into the cold adaptation mechanism of the obligate psychrophilic fungus Mrakia psychrophila	multi_omics	tr_pr	mrakia_psychrophila	temperature	basidiomycets	multiple	terrestrial	fungi		tremellomycetes	cystofilobasidiales	cyfstofilobasidiaceae
2018	ITRAQ-based quantitative proteomic analysis reveals proteomic changes in mycelium of pleurotus ostreatus in response to heat stress and subsequent recovery	proteomics		pleurotus_ostreatus	temperature	basidiomycets	multiple	terrestrial	fungi		agariomycetes	agaricales	pleurotaceae
2020	Comprehensive genomic and proteomic profiling reveal Acinetobacter johnsonii JH7 responses to Sb(III) toxicity	proteomics		acinetobacter_johnsonii	antimony	protobacteria	multiple	multiple	bacteria		gammaproteobacteria	pseudomonadales	moraxellaceae
2020	Multi-omic approach provides insights into osmoregulation and osmoconformation of the crab Scylla paramamosain	multi_omics	tr_pr	scylla_paramamosain	salinity	arthropod	marine	aquatic	animalia		malacostraca	decapoda	portunidae
2020	A new perspective on the toxicity of arsenic-contaminated soil: Tandem mass tag proteomics and metabolomics in earthworms	multi_omics	pr_me	eisenia_fetida	arsenic	annelid	soil	terrestrial	animalia		clitellata	opisthopora	lumbricidae
2020	Molecular response of the mediterranean fruit fly (Diptera:Tephritidae) to Heat	transcriptomics		ceratitis_capitata	temperature	arthropod	multiple	terrestrial	animalia		insecta	diptera	tephritidae
2020	Multi-omics reveals mechanisms of total resistance to extreme illumination of a destert alga	multi_omics	pr_tr_me	chlorella_ohadii	irradiance	chlorophyta	soil	terrestrial	plantae		trebouxiophyceae	chlorellales	chlorellaceae
2020	Time-resolved multi-omics analysis reveals the role of nutrient stress-induced resource reallocatioin for TAG accumulation in oleaginous fungus Mortierella alpina	multi_omics	pr_me	mortierella_alpina	nitrogen	zygomycota	soil	terrestrial	fungi		mortierellales	mortierellales	mortierellaceae
2020	Low UV-C stress modulates Chlamydomonas reinhardtii biomass composition and oxidative stress response through proteomic and metabolimic changes involving novel signalers and effectors	multi_omics	pr_me	chlamydomonas_reinhardtii	UV-C	chlorophyta	freshwater	aquatic	plantae		chlorophyceae	chlamydomonadales	chlamydomonadaceae
2020	Multi-omics analysis of cadmium stress on the ovarian function of the wolf spider Pardosa pseudoannulata	multi_omics	tr_pr	pardosa_pseudoannulata	cadmium	arthropod	multiple	terrestrial	animalia		arachnida	araneae	lycosidae
2020	comparative transcriptome and proteome analysis of heat acclimation in predatory mite neoseiulus barkeri	multi_omics	tr_pr	neoseiulus_barkeri	temperature	arthropod	multiple	terrestrial	animalia		arachnida	acari	phytoseiidae
2020	Integrated analysis of physiological, transcriptomic and metabolimc responses and tolerance mechanisms of nitrite exposure in Litopenaeus vannamei	multi_omics	tr_me	litopenaeus_vannamei	nitrite	arthropod	marine	aquatic	animalia		malacostraca	decapoda	penaeidae
2019	Differential transcriptomic and metabolomic responses in the liver of nile tilapia (Oreochromis niloticus) exposed to acute ammonia	multi_omics	tr_me	oreochromis_niloticus	ammonia	chordata	freshwater	aquatic	animalia		actinopterygii	cichliformes	cichlidae
2019	Environmental temperature variation affects brain protein expression and cognitive abilities in adult zebrafish (Danio rerio): A proteomic and behavioural study	proteomics		Danio_rerio	temperature	chordata	freshwater	aquatic	animalia		actinopterygii	cypriniformes	cyprinidae
2019	High temperature-induced proteomic and metabolomic profiles of a thermophilic Bacillus manusensis isolated from the deep-sea hydrothermal field of Manus Basin	multi_omics	pr_me	bacillus_manusensis	temperature	firmicutes	marine	aquatic	bacteria		NA	NA	NA
2019	Integrated application of multi-omics provides insights into cold stress responses in pufferfish Takifugu fasciatus	multi_omics	tr_me	takifugu_fasciatus	temperature	chordata	marine_freshwater	aquatic	animalia		actinopterygii	tetraodontiformes	tetraodontidae
2018	Gene expression profile of marine Chlorella strains from different latitudes: stress and recovery under elevated temperatures	transcriptomics		chlorella_sp	temperature	chlorophyta	marine	aquatic	plantae		trebouxiophyceae	chlorellales	chlorellaceae
2018	Untargeted NMR-based metabolomics for field-scale monitoring: Temporal reproducibility and biomarker discovery in mosquitofish (Gambusia holbrooki) from a metal(loid)-contaminated wetland	metabolomics		gambusia_holbrooki	mixture	chordata	freshwater	aquatic	animalia		actinopterygii	cyprinodontiformes	poeciliidae
2018	Quantitative proteomics of psychotrophic diazotroph in response to nitrogen deficiency and cold stress	proteomics		pseudomonas_palleroniana	temperature	protobacteria	multiple	terrestrial	bacteria		gammaproteobacteria	pseudomonadales	pseudomonadaceae
2019	Quantitative proteomics of psychotrophic diazotroph in response to nitrogen deficiency and cold stress	proteomics		pseudomonas_palleroniana	nitrogen	protobacteria	multiple	terrestrial	bacteria		gammaproteobacteria	pseudomonadales	pseudomonadaceae
2017	Thermal adaptation strategies of the extremophile bacterium Thermus filiformis based on multi-omics analysis	multi_omics	pr_tr_me	thermus_filiformis	temperature	Deinococcus-thermus	freshwater	aquatic	bacteria		terrabacteria	thermales	thermaceae
2018	Biodiversity in marine invertebrate responses to acute warming revealed by a comparative multi-omics approach	multi_omics	tr_me	liothyrella_uva	temperature	brachiopoda	marine	aquatic	animalia		rhynchonellata	terebratulida	terebratulidae
2018	Biodiversity in marine invertebrate responses to acute warming revealed by a comparative multi-omics approach	multi_omics		laternula_elliptica	temperature	mollusca	marine	aquatic	animalia		bivalvia	anamalodesmata	laternulidae
2018	Biodiversity in marine invertebrate responses to acute warming revealed by a comparative multi-omics approach	multi_omics		aequiyoldia_eightsii	temperature	mollusca	marine	aquatic	animalia		bivalvia	nuculanida	sareptidae
2018	Biodiversity in marine invertebrate responses to acute warming revealed by a comparative multi-omics approach	multi_omics		marseniopsis_mollis	temperature	mollusca	marine	aquatic	animalia		gastropoda	littorinimorpha	velutinidae
2018	Biodiversity in marine invertebrate responses to acute warming revealed by a comparative multi-omics approach	multi_omics		cucumaria_georgiana	temperature	echinodermata	marine	aquatic	animalia		holothuroidea	dendrochirotida	cucumariidae
2016	Combined proteomic and metallomic analyses in Scrobicularia plana clams to assess environmental pollution of estuarine ecosystems	multi_omics	pr_me	scrobicularia_plana	mixture	echinodermata	marine	aquatic	animalia		bivalvia	cardiida	semelidae
2016	Global gene expression profiling using heterologous DNA microarrays to analyze alterations in the transcriptome of Mus spretus mice living in a heavily polluted environment	transcriptomics		mus_spretus	mixture	chordata	above_ground	terrestrial	animalia		mammalia	rodentia	muridae
2016	Global metabolomic responses of Nitrosomonas europaea 19718 to cold stress and altered ammonia feeding patterns	metabolomics		nitrosomonas_europaea	temperature	protobacteria	all	all	bacteria		betaprotobacteria	nitrosomonadales	nitrosomonadaceae
2014	Correlation of transcriptomic responses and metal bioaccumulation in Mytilus edulis L. Reveals early indicators of stress	transcriptomics		mytilus_edulis	cadmium, lead	mollusca	marine	aquatic	animalia		bivalvia	mytilida	mytilidae
2014	ITRAQ-based quantitative proteomic analysis reveals acute hypo-osmotic responsive proteins in the gills of the Japanese eel (Anguilla japonica)	proteomics		anguilla_japonica	salinity	mollusca	marine_freshwater	aquatic	animalia		actinopterygii	anguilliformes	anguillidae
2013	An omics based assessment of cadmium toxicity in the green alga Chlamydomonas reinhardtii	multi_omics	tr_me	chlamydomonas_reinhardtii	cadmium	chlorophyta	freshwater	aquatic	plantae		chlorophyceae	chlamydomonadales	chlamydomonadaceae
2009	Gene expression profiling of copper-induced responses in the intertidal copepod Tigriopus japonicus using a 6K oligochip microarray	transcriptomics		tigriopus_japonicus	copper	arthropod	marine	aquatic	animalia		hexanauplia	harpacticoida	harpacticidae
2013	Comparative proteomic identification of the hemocyte response to cold stress in white shrimp, Litopenaeus vannamei	proteomics		litopenaeus_vannamei	temperature	arthropod	marine	aquatic	animalia		malacostraca	decapoda	penaeidae
2013	Proteomic approach for identifying gonad differential proteins in the oyster (Crassostrea angulata) following food-chain contamination with HgCl2	proteomics		Crassostrea_angulata	mercury	mollusca	marine	aquatic	animalia		bivalvia	ostreida	ostreidae
2015	Earthworms as agents for ecotoxicity in roxarsone-contaminated soil ecosystem: a modeling study uf ultrastructure and proteomics	proteomics		eisenia_fetida	roxarsone	annelid	soil	terrestrial	animalia		clitellata	opisthopora	lumbricidae
2019	Integrating multi-omics and regular analyses identifies the molecular responses of zebrafish brains to graphene oxide: Perspectives in environmental criteria	multi_omics	pr_tr_me	Danio_rerio	graphene oxide	chordata	freshwater	aquatic	animalia		actinopterygii	cypriniformes	cyprinidae
2016	Investigating the mechanisms of silver nanoparticle toxicity in Daphnia magna: a multi-omics approach	multi_omics	tr_me	daphnia_magna	silver nanoparticles	arthropod	freshwater	aquatic	animalia		branchiopoda	cladocera	daphniidae
2017	A multi-omic approach to elucidate low-dose effects of xenobiotics in zebrafish (Danio rerio) larvae	multi_omics	tr_me	Danio_rerio	acetaminophen, diphenhydramine, carbamazepine, fluoxetine	chordata	freshwater	aquatic	animalia		actinopterygii	cypriniformes	cyprinidae
2019	Improved algal toxicity test system for robust omics-driven mode-of-action discovery in chlamydomonas reinhardtii	metabolomics		chlamydomonas_reinhardtii	chlorobenzene	chlorophyta	freshwater	aquatic	plantae		chlorophyceae	chlamydomonadales	chlamydomonadaceae
2020	Integrated transcriptomic and metabolomic responses in the hepatopancreas of kuruma shrimp (Marsupenaeus japonicus) under cold stress	multi_omics	tr_me	marsupenaeus_japonicus	temperature	arthropod	marine	aquatic	animalia		malacostraca	decapoda	penaeidae
2017	Altered expression of metabolites and proteins in wild and caged fish exposed to wastewater effluents in situe	metabolomics	pr_me	carassius_auratus	mixture	chordata	freshwater	aquatic	animalia		actinopterygii	cypriniformes	cyprinidae
2020	A multi-omics concentration-response framework uncovers novel understanding of triclosan effects in the chlorophyte Scenedesmus vacuolatus	multi_omics	tr_me	scenedesmus_vacuolatus	triclosan	chlorophyta	freshwater	aquatic	plantae		chlorophyceae	sphaeropleales	scenedesmaceae
2015	Multi-omics based changes in response to cacmium toxicity in Bacillus licheniformis A	multi_omics	pr_me	bacillus_licheniformis A	cadmium	firmicutes	soil	terrestrial	bacteria		bacilli	bacillales	bacillaceae
2017	Differential metabolic responses in three life stages of mussels Mytilus galloprovincialis exposed to cadmium	metabolomics		Mytilus_galloprovincialis	cadmium	mollusca	marine	aquatic	animalia		bivalvia	mytilida	mytilidae
2018	Proteomic and metabolomic analysis of marine medake (Oryzias melastigma) after acute ammonia exposure	multi_omics	pr_me	oryzias_melastigma	ammonia	chordata	freshwater	aquatic	animalia		actinopterygii	beloniformes	adrianichthyidae
2017	Gill damage and neurotoxicity of ammonia nitrogen on the clam Ruditapes philippinarum	metabolomics		ruditapes_philippinarum	ammonia	mollusca	marine	aquatic	animalia		bivalvia	venerida	veneridae
2009	Ecotoxicity of Silver nanoparticles on the soil nematode caenorhabditis elegans using functional ecotoxiogenomis	transcriptomics		caenorhabditis_elegans	silver nanoparticles	nematoda	soil	terrestrial	animalia		chromadorea	rhabditida	rhabditidae
2007	Daphnia magna ecotoxicogenomics provides mechanistic insights into metal toxicity	transcriptomics		daphnia_magna	mixture	arthropod	freshwater	aquatic	animalia		branchiopoda	cladocera	daphniidae
2007	Daphnia magna and ecotoxicogenomics: Gene expression profiles of the anti-edcysteroidal fungicide fenarimol using energy-, molting- and life stage-related cDNA libraries	transcriptomics		daphnia_magna	fenarimol	arthropod	freshwater	aquatic	animalia		branchiopoda	cladocera	daphniidae
2018	Hepatic proteome and toxic response of early-life stage rainbow trout (Oncorhynchus mykiss) to the aquatic harbicide, Reward(c)	proteomics		Oncorhynchus_mykiss	reward	chordata	freshwater	aquatic	animalia		actinopterygii	salmoniformes	salmonidae
2012	A metabolomics based test of independent action and concentration addition using the earthworm Lumbricus rubellus	metabolomics		lumbricus_rubellus	chlorpyrifos, nickel, imidacloprid, thiacloprid	annelid	soil	terrestrial	animalia		clitellata	opisthopora	lumbricidae
2009	Metabonomic assessment of toxicity of 4-fluoroaniline, 3,5-difluoroaniline and 2-fluoro-4-methylaniline to the earthworm Eisenia veneta (rosa): Identification of new endogenous biomarkers	metabolomics		eisenia_veneta	4-fluoroaniline, 35-difluoroaniline, 2-fluoro-4-methylaniline	annelid	soil	terrestrial	animalia		oligochaeta	haplotaxida	lumbricidae
2002	Metabolism of 4-fluoroaniline and 4-fluorobiphenyl in the earthworm Eisenia veneta characterized by high-resolution NMR spectroscopy with diectly coupled HPLC-NMR and HPLC-MS	metabolomics		eisenia_veneta	4-fluoroaniline, 4-fluorobiphenyl	annelid	soil	terrestrial	animalia		oligochaeta	haplotaxida	lumbricidae
2007	Metabolic profile biomarkers of metal contamination in a sentinel terrestrial species are applicable across multiple sites	metabolomics		lumbricus_rubellus	mixture	annelid	soil	terrestrial	animalia		clitellata	opisthopora	lumbricidae
2008	“Systems toxicology” approach identifies coordinated metabolic responses to copper in a terrestrial non-model invertebrate, the earthworm Lumbricus rubellus	multi_omics	tr_me	lumbricus_rubellus	copper	annelid	soil	terrestrial	animalia		clitellata	opisthopora	lumbricidae
2008	Changes in the immune response and metabolic fingerprint of the mussel, Mytilus edulis (Linnaeus) in response to lowered salinity and physical stress	metabolomics		mytilus_edulis	salinity	mollusca	freshwater	terrestrial	animalia		bivalvia	mytilida	mytilidae
2010	Disruption of the steroid metabolome in fish caused by exposure to the environmental estrogen 17a-ethinylestradiol	metabolomics		rutilus_rutilus	17alpha-Ethinylestradiol	chordata	freshwater	aquatic	animalia		actinopterygii	cypriniformes	cyprinidae
2009	The metabolimic responses of Caenorhabditis elegans to cadmium are largely independent of metallothionein status, but dominated by changes cystathionine	metabolomics		caenorhabditis_elegans	cadmium	nematoda	soil	terrestrial	animalia		chromadorea	rhabditida	rhabditidae
2008	A metabolimics based approach to assessing the toxicity of the polyaromatic hydrocarbon pyrene to the earthworm Lumbricus rubellus	metabolomics		lumbricus_rubellus	pyrene	annelid	soil	terrestrial	animalia		clitellata	opisthopora	lumbricidae
2012	1H NMR-based metabolomics approach to assess toxicity of bunker a heavy oil to freshwater carp, Cyprinus carpio	metabolomics		Cyprinus_carpio	oil	chordata	freshwater	aquatic	animalia		actinopterygii	cypriniformes	cyprinidae
2013	The impact of temperature on the metabolome and endocrine metabolic signals in atlantic salmon (salmo salar)	metabolomics		salmo_salar	temperature	annelid	soil	terrestrial	animalia		actinopterygii	salmoniformes	salmonidae
2011	1H NMR-based metabolomics of time-dependent responses of Eisenia fetida to sub-lethal phenanthrene exposure	metabolomics		eisenia_fetida	phenanthrene	annelid	soil	terrestrial	animalia		clitellata	opisthopora	lumbricidae
2011	1H NMR-based metabolomic observation of a two-phased toxic mode of action in Eisenia fetida after sub-lethal phenanthrene exposure	metabolomics		eisenia_fetida	phenanthrene	annelid	soil	terrestrial	animalia		clitellata	opisthopora	lumbricidae
2012	1H NMR metabolomics of Eisenia fetida responses after sub-lethal exposure to perfluorooctanoic acid and perfluorooctane sulfonate	metabolomics		eisenia_fetida	perfluorooctanoic acid, perfluorooctane sulfonate	annelid	soil	terrestrial	animalia		clitellata	opisthopora	lumbricidae
2013	1H NMR-based metabolomic analysis of polar and non-polar earthworm metabolites after sub-lethal exposure to phenanthrene	metabolomics		eisenia_fetida	phenanthrene	annelid	soil	terrestrial	animalia		clitellata	opisthopora	lumbricidae
2013	1H NMR-based metabolomics investigation of Daphnia magna responses to sub-lethal exposure to arsenic, copper and lithium	metabolomics		daphnia_magna	arsenic, copper, lithium	arthropod	freshwater	aquatic	animalia		branchiopoda	cladocera	daphniidae
2013	Impacts of 17a-ethynylestradiol exposure on metabolite profiles of zebrafish (Danio rerio) liver cells	metabolomics		Danio_rerio	17alpha-Ethinylestradiol	chordata	freshwater	aquatic	animalia		actinopterygii	cypriniformes	cyprinidae
2012	Gas chromatography-mass spectrometry for metabolite profiling of Japanese medaka (Oryzias latipes) juveniles exposed to malathion	metabolomics		Oryzias_latipes	malathion	chordata	freshwater	aquatic	animalia		actinopterygii	beloniformes	adrianichthyidae
2006	Metabolic effects of dinoseb, diazinon and esfenvalerate in eyed eggs and alevins of Chinook salmon (Oncorhynchus tshawytscha) determined by 1H NMR	metabolomics		oncorhynchus_tshawytscha	dinoseb, diazinon, esfenvalerate	chordata	marine	aquatic	animalia		actinopterygii	salmoniformes	salmonidae
2000	An NMR-based metabonomic investigation of the toxic effects of 3-trifluoromethyl-aniline on the earthworm Eisenia veneta	metabolomics		eisenia_veneta	3-trifluoromethyl-aniline	annelid	soil	terrestrial	animalia		oligochaeta	haplotaxida	lumbricidae
2012	Earthworm sublethal responses to titanium dioxided nanomaterial in soil detected by 1H NMR metabolomics	metabolomics		eisenia_veneta	titanium dioxided nanomaterial	annelid	soil	terrestrial	animalia		oligochaeta	haplotaxida	lumbricidae
2012	Earthworm metabolomic responses after exposure to aged PCB contaminated soils	metabolomics		eisenia_fetida	PCB	annelid	soil	terrestrial	animalia		clitellata	opisthopora	lumbricidae
2011	1-D and 2-D NMR metabolomics of earthworm responses to sub-lethal trifluralin and endosulfan exposure	metabolomics		eisenia_fetida	trifluralin, endosulfan	annelid	soil	terrestrial	animalia		clitellata	opisthopora	lumbricidae
2006	Proteomic investigation of cadmium toxicity on the midge Chironomus riparius Meigen larvae	proteomics		chironomus_riparius	cadmium	arthropod	freshwater	aquatic	animalia		insecta	diptera	chironomidae
2017	Transcriptome analysis of the brain of the sea bream (Sparus aurata) after exposure to human pharmaceuticals at realistic environmental concentrations	transcriptomics		sparus_aurata	acetaminophen, carbamazepine, atenolol	chordata	marine	aquatic	animalia		actinopterygii	perciformes	sparidae
2006	Comparison of protein expression in plasma from nonylphenol and bisphenol A-exposed atlantic cod (Gadus morhua) and turbot (Scophthalmus maximus) by used of SELDI-TOF	proteomics		Gadus_morhua	nonylphenol, bisphenol A	chordata	marine	aquatic	animalia		actinopterygii	gadiformes	gadidae
2006	Comparison of protein expression in plasma from nonylphenol and bisphenol A-exposed atlantic cod (Gadus morhua) and turbot (Scophthalmus maximus) by used of SELDI-TOF	proteomics		scophthalmus_maximus	nonylphenol, bisphenol A	chordata	freshwater	aquatic	animalia		actinopterygii	pleuronectiformes	scophthalmidae
2017	Developing transcriptional profiles in Orbicella franksi exposed to copper: characterizing responses associated with a spectrum of laboratory-controlled environmental conditions	transcriptomics		orbicella_franksi	copper	cnidaria	marine	aquatic	animalia		anthozoa	scleractinia	merulinidae
2014	Assessing mechanisms of toxicant response in the amphipod Melita plumulosa through transcriptomic profile	transcriptomics		melita_plumulosa	ammonia, bifenthrin, fipronil, diesel, oil, copper, nickel, zinc	arthropod	marine	aquatic	animalia		malacostraca	amphipoda	melitidae
2017	Expression of genes involved in oxidative stress response in colonies of the ascidian Botryllus schlosseri exposed to various environmental conditions	transcriptomics		botryllus_schlosseri	mixture	chordata	marine	aquatic	animalia		ascidiacea	stolidobranchia	styelidae
2016	Development of gene expression-based biomarkers of exposure to metals and pesticides in the freshwater amphipod Hyalella azteca	transcriptomics		hyalella_azteca	cadmium, copper, DDT, permethrin, imidacloprid	arthropod	freshwater	aquatic	animalia		malacostraca	amphipoda	hyalellidae
2017	Adaptive response under multiple stress exposure in fish: From the molecular to individual level	metabolomics		carassius_auratus	temperature, S-metolachlor, isoproturon, linuron, atrazine-desethyl, aclonifen, pendimethalin, tebuconazole	chordata	freshwater	aquatic	animalia		actinopterygii	cypriniformes	cyprinidae
2019	Differential biological effects in two pedigrees of clam Ruditapes philippinarum exposed to cadmium using iTRAQ-based proteomics	proteomics		ruditapes_philippinarum	cadmium	mollusca	freshwater	aquatic	animalia		bivalvia	venerida	veneridae
2014	Metabolic signatures associated with environmental pollution by metals in Donana National Park using P. Clarkii as bioindicator	metabolomics		procambarus_clarkii	mixture	arthropod	freshwater	aquatic	animalia		malacostraca	decapoda	cambaridae
2017	Proteomic analysis of sockeye salmon serum as a tool for biomarker discovery and new insight into the sublethal toxicity of diluted bitumen	proteomics		oncorhynchus_nerka	bitumen	chordata	marine	aquatic	animalia		actinopterygii	salmoniformes	salmonidae
2018	Transcriptional inhibition of TCDD-mediated induction of cytochrome P450 1A1 and alteration of protein expression in a zebrafish hepatic cell line following the administration of TCDD and cd(2)	transcriptomics		Danio_rerio	TCDD, cadmium	chordata	freshwater	aquatic	animalia		actinopterygii	cypriniformes	cyprinidae
2017	Linking genomic responses of gonads with reproductive impairment in marine medaka (Oryzias melastigma) exposed chronically to the chemopreventive and antifoulding agend, 3,3’-diindolylmethane (DIM)	transcriptomics		Oryzias melastigma	33_diindolylmethane	chordata	freshwater	aquatic	animalia		actinopterygii	beloniformes	adrianichthyidae
2016	High conservation in transcriptomic and proteomic response of white sturgeon to equipotent concentrations of 2, 3, 7, 8-TCDD, PCB 77, and benzo [a] pyrene	multi_omics	tr_pr	acipenser_transmontanus	TCDD, PCB, benzo(a)pyrene	chordata	marine	aquatic	animalia		actinopterygii	acipenseriformes	acipenseridae
2019	Proteomic analysis of the hepatoxicity of Microcystis aeruginosa in adult zebrafish (Danio rerio) and its potential mechanisms	proteomics		Danio_rerio	Microcystis aeruginosa	chordata	freshwater	aquatic	animalia		actinopterygii	cypriniformes	cyprinidae
2018	Study of the plasma proteome of Atlantic cod (Gadus morhua): changes due to crude oil exposure	proteomics		Gadus_morhua	oil	chordata	marine	aquatic	animalia		actinopterygii	gadiformes	gadidae
2017	Impacts of triclosan exposure on zebrafish early-life stage: Toxicity and acclimation mechanisms	proteomics		Danio_rerio	triclosan	chordata	freshwater	aquatic	animalia		actinopterygii	cypriniformes	cyprinidae
2017	How consistent are we? Interlaboratory comparison study in fathead minnows using the model estrogen 17a-ethinylestradiol to develop recommendations for environmental transcriptomics	transcriptomics		pimephales_promelas	17alpha-Ethinylestradiol	chordata	freshwater	aquatic	animalia		actinopterygii	cypriniformes	cyprinidae
2012	Concentration-response concept in ecotoxicoproteomics: effects of different phenanthrene concentrations to the zebrafish (Danio rerio) embryo proteome	proteomics		Danio_rerio	phenanthrene	chordata	freshwater	aquatic	animalia		actinopterygii	cypriniformes	cyprinidae
2019	Coupling caging and proteomics on the European flunder (Platichthys flesus) to assess the estuarine water quality at micro scale	proteomics		Platichthys_flesus	mixture	chordata	marine	aquatic	animalia		actinopterygii	pleuronectiformes	pleuronectidae
2017	Molecular networks related to the immune system and mitochondria are targets for the pesticide dieldrin in the zebrafish (Danio rerio) central nervous system	transcriptomics		Danio_rerio	dieldrin	chordata	freshwater	aquatic	animalia		actinopterygii	cypriniformes	cyprinidae
2017	2D-DIGE as a proteomic biomarker discovery tool in environmental studies with Procambarus clarkii	proteomics		procambarus_clarkii	mixture	arthropod	freshwater	aquatic	animalia		malacostraca	decapoda	cambaridae
2017	Ecotoxico-Proteomics for Aquatic Environmental monitoring: First in situ application of a new proteomics-based multibiomarker assay using caged amphipods	proteomics		gammarus_fossarum	mixture	arthropod	freshwater	aquatic	animalia		malacostraca	amphipoda	gammaridae
2017	Assessing the relevance of a multiplexed methodology for proteomic biomarker measurement in the invertebrate species Gammarus fossarum: a physiological and ecotoxicological study	proteomics		gammarus_fossarum	cadmium, lead	arthropod	freshwater	aquatic	animalia		malacostraca	amphipoda	gammaridae
2018	How cyclophosphamide at environmentally relevant concentration influences Daphnia magna life history and its proteome	proteomics		daphnia_magna	cyclophosphamide	arthropod	freshwater	aquatic	animalia		branchiopoda	cladocera	daphniidae
2019	Evaluation of mitochondrial toxicity of cadmium in clam Ruditapes philippinarum using iTRAQ-based proteomics	proteomics		ruditapes_philippinarum	cadmium	mollusca	marine	aquatic	animalia		bivalvia	venerida	veneridae
2018	Physiological effects caused by microcystin-producing and non-microcystin producing Microcystis aeruginosa on medaka fish: a proteomic and metabolomic study on liver	multi_omics	pr_me	Oryzias_latipes	Microcystis aeruginosa	chordata	freshwater	aquatic	animalia		actinopterygii	beloniformes	adrianichthyidae
2018	Proteomic analysis of ametryn toxicity in zebrafish embryos	proteomics		Danio_rerio	ametryn	chordata	freshwater	aquatic	animalia		actinopterygii	cypriniformes	cyprinidae
2017	Differential effects of bisphenol a toxicity on oyster (Crassostrea angulata) gonads as revealed by label-free quantitative proteomics	proteomics		Crassostrea_angulata	bisphenol A	mollusca	marine	aquatic	animalia		bivalvia	ostreida	ostreidae
2018	Proteomic response of gill microsomes of Crassostrea brasiliana exposed to diesel fuel water-accommodated fraction	proteomics		crassostrea_brasiliana	diesel	mollusca	marine	aquatic	animalia		bivalvia	ostreida	ostreidae
2019	Proteomic analysis of oxidized proteins in the brain and liver of the Nile tilapia (Oreochromis niloticus) exposed to a water-accomodated fraction of Maya crude oil	proteomics		oreochromis_niloticus	oil	chordata	freshwater	aquatic	animalia		actinopterygii	cichliformes	cichlidae
2000	Protein expression signatures identified in Mytilus edulis exposed to PCBs, copper and salinity stress	proteomics		mytilus_edulis	PCB, copper, salinity		freshwater	aquatic	animalia		bivalvia	mytilida	mytilidae
2019	Label-free and iTRAQ proteomics analysis in the liver of zebrafish (Danio rerio) following dietary exposure to the organochlorine pesticide dieldrin	proteomics		Danio_rerio	dieldrin	chordata	freshwater	aquatic	animalia		actinopterygii	cypriniformes	cyprinidae
2017	Toxic responses of Perna viridis hepatopancreas exposed to DDT, benzo(a)pyrene and their mixture uncovered by iTRAQ-based proteomics and NMR-based metabolomics	multi_omics	pr_me	perna_viridis	DDT, benzo(a)pyrene	mollusca	marine	aquatic	animalia		bivalvia	mytilida	mytilidae
2017	Global proteome profiling of a marine copepod and the mitigating effect of ocean acidification on mercury toxicity after multigenerational exposure	proteomics		tigriopus_japonicus	mercury	arthropod	marine	aquatic	animalia		hexanauplia	harpacticoida	harpacticidae
2018	ITRAQ-based quantitative proteomic analysis identified Eno1 as a cadmium stress response gene in Probsilocerus akamusi (Tokunaga) hemolymph	proteomics		propsilocerus_akamusi	cadmium	arthropod	freshwater	aquatic	animalia		insecta	diptera	chironomidae
2006	cDNA cloning and gene expression of ribosomal S9 protein gene in the mollusc Corbicula fluminea: a new potential biomarker of metal contamination up-regulated by cadmium and repressed by zinc	transcriptomics		corbicula_fluminea	cadmium, zinc	mollusca	freshwater	aquatic	animalia		bivalvia	venerida	cyrenidae
2010	Serial analysis of gene expression in the skeletal muscles of zebrafish fed with a methylmercury-contaminated diet	transcriptomics		Danio_rerio	methylmercury	chordata	freshwater	aquatic	animalia		actinopterygii	cypriniformes	cyprinidae
2012	Effects of dietary methylmercury on the zebrafish brain: histological, mitochondrial and gene transcription analyses	transcriptomics		Danio_rerio	methylmercury	chordata	freshwater	aquatic	animalia		actinopterygii	cypriniformes	cyprinidae
2012	RNA-seq reveals complex genetic response to deepwater horizon oil release in Fundulus grandis	transcriptomics		Fundulus_grandis	oil	chordata	marine	aquatic	animalia		actinopterygii	cyprinodontiformes	fundulidae
2005	Comparative effects of dietary methylmercury on gene expression in liver, skeletal muscle, and brain of the zebrafish (Danio rerio)	transcriptomics		Danio_rerio	methylmercury	chordata	freshwater	aquatic	animalia		actinopterygii	cypriniformes	cyprinidae
2014	Response of detoxification gene mRNA expression and selection of molecular biomarkers in the clam Ruditapes philippinarum exposed to benzo[a]pyrene	transcriptomics		ruditapes_philippinarum	benzo(a)pyrene	mollusca	marine	aquatic	animalia		bivalvia	venerida	veneridae
2013	Impact of benzo(a)pyrene, Cu and their mixture on the proteomic response of Mytilus galloprovincialis	proteomics		Mytilus_galloprovincialis	benzo(a)pyrene, copper	mollusca	marine	aquatic	animalia		bivalvia	mytilida	mytilidae
2013	Transcriptional response of the mussel Mytilus galloprovincialis (Lam.) following exposure to heat stress and copper	transcriptomics		Mytilus_galloprovincialis	temperature, copper	mollusca	marine	aquatic	animalia		bivalvia	mytilida	mytilidae
2013	Detecting genome-wide gene transcription profiles associated with high pollution burden in the critically endangered European eel	transcriptomics		anguilla_anguilla	mixture	chordata	freshwater	aquatic	animalia		actinopterygii	anguilliformes	anguillidae
2014	Proteomic investigation of male Gammarus fossarum, a freshwater crustacean, in response to endocrine disruptors	proteomics		gammarus_fossarum	cadmium, methoxygenozide, pyriproxyfen	arthropod	freshwater	aquatic	animalia		malacostraca	amphipoda	gammaridae
2013	Proteomic and metabolomic responses of clam Ruditapes philippinarum to arsenic exposure under different salinities	multi_omics	pr_me	ruditapes_philippinarum	salinity	mollusca	marine	aquatic	animalia		bivalvia	venerida	veneridae
2010	Changes in gene expression profile of medaka with acute toxicity of Arochlor 1260, a polychlorinated biphenyl mixture	transcriptomics		Oryzias_latipes	PCB	chordata	freshwater	aquatic	animalia		actinopterygii	beloniformes	adrianichthyidae
2020	Development of the transcriptome for a sediment ecotoxicological model species, Chironomus dilutus	transcriptomics		chironomus_dilutus	cadmium, nonylphenol, triclosan	arthropod	freshwater	aquatic	animalia		insecta	diptera	chironomidae
2020	Multi-omics analyses reveal molecular mechanisms for the antagonistic toxicity of carbon nanotubes and ciproflaxacin to Escherichia coli	multi_omics		escherichia_coli	carbon nanotubes, ciprofloxacin	protobacteria	multiple	multiple	bacteria		gammaproteobacteria	enterobacteralse	enterobacteriaceae
2020	Proteomic analysis of whole-body responses in medaka (Oryzias latipes) exposed to benzalkonium chloride	proteomics		Oryzias_latipes	benzalkonium chloride	chordata	freshwater	aquatic	animalia		actinopterygii	beloniformes	adrianichthyidae
2017	De novo assembly of the ringed seal (Pusa hispida) blubber transcriptome: A tool that enables identification of molecular health indicators associated with PCB exposure	transcriptomics		pusa_hispida	PCB	chordata	multiple	multiple	animalia		mammalia	carnivora	phocidae
2020	Dynamic proteome responses to sequential reduction of Cr(VI) and adsorption of Pb(II) by Pannonibacter phragmitetus BB	proteomics		Pannonibacter_phragmitetus BB	chromium, lead	protobacteria	multiple	multiple	bacteria		alphaproteobacteria	hyphomicrobiales	stappiaceae
2020	Transcriptional and biochemical responses in a freshwater mussel (Anodonta anatina) under environmentally relevant Cu exposure	transcriptomics		Anodonta_anatina	copper	mollusca	freshwater	aquatic	animalia		bivalvia	unionida	unionidae
2020	Toxicological responses, bioaccumulation, and metabolic fate of triclosan in Chlamydomonas reinhardtii	metabolomics		chlamydomonas_reinhardtii	triclosan	chlorophyta	freshwater	aquatic	plantae		chlorophyceae	chlamydomonadales	chlamydomonadaceae
2019	Molecular signalling pathways elicited by 17a-ethinylestradiol in Japanese medaka male larvae undergiong gonadal differentiation	transcriptomics		Oryzias_latipes	17alpha-Ethinylestradiol	chordata	freshwater	aquatic	animalia		actinopterygii	beloniformes	adrianichthyidae
2019	Transcriptomic analysis of the impacts of ethinylestradiol (EE2) and its consequences for proliferative kidney disease outcome in rainbow trout (Oncorhynchus mykiss)	transcriptomics		Oncorhynchus_mykiss	17alpha-Ethinylestradiol	chordata	freshwater	aquatic	animalia		actinopterygii	salmoniformes	salmonidae
2004	Identification of transcriptioinal effects of ethynyl oestradiol in male plaice (Pleuronectes platessa) by suppression subtractive hybridisation and a nylon macro-array	transcriptomics		Pleuronectes_platessa	17alpha-Ethinylestradiol	chordata	marine	aquatic	animalia		actinopterygii	pleuronectiformes	pleuronectidae
2014	Dietary exposure of 17-alpha ethinylestradiol modulates physiological end-points and gene signaling pathways in female largemouth bass (Micropterus salmoides)	transcriptomics		Micropterus_salmoides	17alpha-Ethinylestradiol	chordata	freshwater	aquatic	animalia		actinopterygii	perciformes	centrarchidae
2010	An integrated transcriptomic and proteomic approach characterizing estrogenic and metabolic effects of 17 a-ethinylestradiol in zebrafish (Danio rerio)	multi_omics	tr_pr	Danio_rerio	17alpha-Ethinylestradiol	chordata	freshwater	aquatic	animalia		actinopterygii	cypriniformes	cyprinidae
2013	The effects of 17-a-ethinylestradil (EE2) on molecular signaling cascades in mumichog (Fundulus heteroclitus)	transcriptomics		fundulus_heteroclitus	17alpha-Ethinylestradiol	chordata	freshwater	aquatic	animalia		actinopterygii	cyprinodontiformes	fundulidae
2017	Estrogen-responsive gene networks in the teleost liver: what are the key molecular indicators?	transcriptomics		pimephales_promelas	17alpha-Ethinylestradiol	chordata	freshwater	aquatic	animalia		actinopterygii	cypriniformes	cyprinidae
2007	Toxicogenomic responses in rainbow trout (Oncorhynchus mykiss) hepatocytes exposed to model chemicals and a synthetic mixture	transcriptomics		Oncorhynchus_mykiss	17alpha-Ethinylestradiol, (TCDD), paraquat, microM 4-nitroquinoline-1-oxide (NQO)	chordata	freshwater	aquatic	animalia		actinopterygii	salmoniformes	salmonidae
2017	Responses of gonadal transcriptome and physiological analysis following exposure to 17a-ethynylestradiol in adult rare minnow Gobiocypris rarus	transcriptomics		gobiocypris_rarus	17alpha-Ethinylestradiol	chordata	freshwater	aquatic	animalia		actinopterygii	cypriniformes	cyprinidae
2009	Gene expression responses in male fathead minnows exposed to binary mixtures of an estrogen and antiestrogen	transcriptomics		pimephales_promelas	17alpha-Ethinylestradiol, ZM	chordata	freshwater	aquatic	animalia		actinopterygii	cypriniformes	cyprinidae
2012	Time-course recovery of estrogen-responsive genes of a cichlid fish exposed to waterborne octylphenol	transcriptomics		cichlasoma_dimerus	octylphenol	chordata	freshwater	aquatic	animalia		actinopterygii	cichliformes	cichlidae
2007	Sensitive and robust gene expression changes in fish exposed to estrogen-a microarray approach	transcriptomics		Oncorhynchus_mykiss	estrogen	chordata	freshwater	aquatic	animalia		actinopterygii	salmoniformes	salmonidae
2013	High-throughput sequencing and pathway analysis reveal alteration of the pituitary transcriptome by 17a-ethynylestradiol (EE2) in female coho salmon, Oncorhynchus kisutch	transcriptomics		oncorhynchus_kisutch	17alpha-Ethinylestradiol	chordata	freshwater	aquatic	animalia		actinopterygii	salmoniformes	salmonidae
2012	Gene expression profiles in the testis associated with testis-ova in adult Japanese medaka (Oryziaslatipes) exposed to 17a-ethinylestradiol	transcriptomics		Oryzias_latipes	17alpha-Ethinylestradiol	chordata	freshwater	aquatic	animalia		actinopterygii	beloniformes	adrianichthyidae
2007	Gene expression profiles in rainbow trout, Onchorynchus mykiss, exposed to a simple chemical mixture	transcriptomics		Oncorhynchus_mykiss	2244_tetrabromodiphenyl_ether, chromium, ethynylestradiol	chordata	freshwater	aquatic	animalia		actinopterygii	salmoniformes	salmonidae
2018	Systems analysis of the liver transcriptome in adult male zebrafish exposed to the plasticizer (2-ethylhexyl) phthalate (DEHP)	transcriptomics		Danio_rerio	DEHP	chordata	freshwater	aquatic	animalia		actinopterygii	cypriniformes	cyprinidae
2015	17a-ethinylestradiol (EE2) effect on global gene expression in primary rainbow trout (Oncorhynchus mykiss) hepatocytes	transcriptomics		Oncorhynchus_mykiss	17alpha-Ethinylestradiol	chordata	freshwater	aquatic	animalia		actinopterygii	salmoniformes	salmonidae
2010	Hepatic transcriptomic and metabolomic responses in the stickleback (Gasterosteus aculeatus) exposed to ethinyl-estradiol	multi_omics	tr_me	Gasterosteus_aculeatus	17alpha-Ethinylestradiol	chordata	marine	aquatic	animalia		actinopterygii	gasterosteiformes	gasterosteidae
2015	RNA-Seq-based transcriptome analysis of Korean rose bitterling (Rhodeus uyekii) exposed to synthetic estrogen 17a-ethinylestradiol (EE2)	transcriptomics		rhodeus_uyekii	17alpha-Ethinylestradiol	chordata	freshwater	aquatic	animalia		actinopterygii	cypriniformes	cyprinidae
2007	Microarray analysis in the zebrafish (Danio rerio) liver and telencaphalon after exposure to low concentration of 17a-ethinylestradiol	transcriptomics		Danio_rerio	17alpha-Ethinylestradiol	chordata	freshwater	aquatic	animalia		actinopterygii	cypriniformes	cyprinidae
2006	Gene expression profiling in the neuroendocrine brain of male goldfish (Carassius auratus) exposed to 17a-ethinylestradiol	transcriptomics		carassius_auratus	17alpha-Ethinylestradiol	chordata	freshwater	aquatic	animalia		actinopterygii	cypriniformes	cyprinidae
2012	Anchoring ethinylestradiol induced gene expression changes with testicular morphology and reproductive function in the medaka	transcriptomics		Oryzias_latipes	17alpha-Ethinylestradiol	chordata	freshwater	aquatic	animalia		actinopterygii	beloniformes	adrianichthyidae
2006	Expression profiling of endocrine-disrupting compounds using a customized Cyprinus carpio cDNA microarray	transcriptomics		Cyprinus_carpio	17beta-estradiol, 17alpha-Ethinylestradiol, 4-nonylphenol, bisphenol A, tamoxifen, 17alpha-methyltestosterone, 11-ketotestosterone, dibutyl phthalate, flutamide, vinclozolin, hydrocortisone, copper, propylthiouracil, and a mixture of L-triiodothyronine, L-thyroxine	chordata	freshwater	aquatic	animalia		actinopterygii	cypriniformes	cyprinidae
2018	Testis transcriptome alterations in zebrafish (Danio rerio) with reduced fertility due to developmental exposure to 17a-ethinyl estradiol	transcriptomics		Danio_rerio	17alpha-Ethinylestradiol	chordata	freshwater	aquatic	animalia		actinopterygii	cypriniformes	cyprinidae
2016	Microarray analysis of di-n-butyl phthalate and 17a-ethinyl-oestradiol responses in three-spined stickleback testes reveals novel candidate genes for endocrine disruption	transcriptomics		Gasterosteus_aculeatus	17alpha-Ethinylestradiol	chordata	marine	aquatic	animalia		actinopterygii	gasterosteiformes	gasterosteidae
2019	Transcriptomic analysis of short-term 17a-ethynylestradiol exposure in two Californian sentinel fish species sardine (Sardinops sagax) and mackerel (Scomber japonicus)	transcriptomics		sardinops_sagax	17alpha-Ethinylestradiol	chordata	marine	aquatic	animalia		actinopterygii	clupeiformes	clupeidae
2019	Transcriptomic analysis of short-term 17a-ethynylestradiol exposure in two Californian sentinel fish species sardine (Sardinops sagax) and mackerel (Scomber japonicus)	transcriptomics		scomber_japonicus	17alpha-Ethinylestradiol	chordata	marine	aquatic	animalia		actinopterygii	scombriformes	scombridae
2017	characterisation of the transcriptome of male and female wild-type guppy brains with RNA-Seq and consequences of exposure to the pharmaceutical pollutant, 17a-ethinyl estradiol	transcriptomics		poecilia_reticulata	17alpha-Ethinylestradiol	chordata	freshwater	aquatic	animalia		actinopterygii	cyprinodontiformes	poeciliidae
2007	Gonadal transcriptome responses and physiological consequences of exposure to oestrogen in breeding zebrafish (Danio rerio)	transcriptomics		Danio_rerio	17alpha-Ethinylestradiol	chordata	freshwater	aquatic	animalia		actinopterygii	cypriniformes	cyprinidae
2013	Transcriptome alterations in zebrafish embryos after exposure to environmental estrogens and anti-androgens can reveal endocrine disruption	transcriptomics		Danio_rerio	genistein, bisphenol A, methylparaben, linuron, prochloraz, propanil	chordata	freshwater	aquatic	animalia		actinopterygii	cypriniformes	cyprinidae
2006	Dynamics of 17a-ethynylestradiol exposure in rainbow trout (Oncorhynchus mykiss): absorption, tissue disruption, and hepatic gene expression pattern	transcriptomics		Oncorhynchus_mykiss	17alpha-Ethinylestradiol	chordata	freshwater	aquatic	animalia		actinopterygii	salmoniformes	salmonidae
2018	Early phosphoproteoomic changes for adverse outcome pathway development in the fathead minnow (Pimephales promelas) brain	proteomics		pimephales_promelas	17alpha-Ethinylestradiol, levonorgestrel (LNG)	chordata	freshwater	aquatic	animalia		actinopterygii	cypriniformes	cyprinidae
2015	Early exposure of 17a-ethynylestradiol and diethylstilbestrol induces morphological changes and alters ovarian steroidogenic pathway enzyme gene expression in catfish, Clarias gariepinus	transcriptomics		clarias_gariepinus	17alpha-Ethinylestradiol	chordata	freshwater	aquatic	animalia		actinopterygii	siluriformes	clariidae
2017	Hepatic transcriptional responses to copper in the three-spined stickleback are affected by their pollution exposure history	transcriptomics		Gasterosteus_aculeatus	copper	chordata	multiple	aquatic	animalia		actinopterygii	gasterosteiformes	gasterosteidae
2018	RNA-seq analysis of transcriptome responses in Atlantic cod (Gadus morhua) precision-cut liver slices exposed to benzo(a)pyrene and 17a-ethynylestradiol	transcriptomics		Gadus_morhua	benzo(a)pyrene, 17alpha-Ethinylestradiol	chordata	marine	aquatic	animalia		actinopterygii	gadiformes	gadidae
2020	Detoxification and reproductive system-related gene expression following exposure to Cu(OH)2 nanopesticide in water flea (Daphnia magna Straus 1820)	transcriptomics		daphnia_magna	copper	arthropod	freshwater	aquatic	animalia		branchiopoda	cladocera	daphniidae
2018	Comparative effects of cadmium, zinc, arsenic and chromium on olfactory-mediated neurobehavior and gene expression in larval zebrafish (Danio rerio)	transcriptomics		Danio_rerio	cadmium, zinc, arsenic, chromium	chordata	freshwater	aquatic	animalia		actinopterygii	cypriniformes	cyprinidae
2017	Oxidative stress and gene expression of earthworm (Eisenia fetida) to clothianidin	transcriptomics		eisenia_fetida	clothianidin	annelid	soil	terrestrial	animalia		clitellata	opisthopora	lumbricidae
2017	Chronic diclofenac exposure affects gill integrity and pituitary gene expression and displays estrogenic activity in nile tilapia (Oreochromis niloticus)	transcriptomics		oreochromis_niloticus	diclofenac	chordata	freshwater	aquatic	animalia		actinopterygii	cichliformes	cichlidae
2005	Comparative effects of direct cadmium contamination on gene expression in gills, liver, skeletal muscles and brain of the zebrafish (Danio rerio)	transcriptomics		Danio_rerio	cadmium	chordata	freshwater	aquatic	animalia		actinopterygii	cypriniformes	cyprinidae
2017	Effects of copper on hemocyte apoptosis, ROS production, and gene expression in white shrimp Litopenaeus vannamei	transcriptomics		litopenaeus_vannamei	copper	arthropod	marine	aquatic	animalia		malacostraca	decapoda	penaeidae
2015	Transcriptional responses of earthworm (eisenia fetida) exposed to naphthenic acids in soil	transcriptomics		eisenia_fetida	naphthenic acid	annelid	soil	terrestrial	animalia		clitellata	opisthopora	lumbricidae
2014	Analysis of gene expression changes, caused by exposure to nitrite, in metabolic and antioxidant enzymes in the red claw crayfish, Cherax quadricarinatus	transcriptomics		cherax_quadricarinatus	nitrite	arthropod	freshwater	aquatic	animalia		malacostraca	decapoda	parastacidae
2019	Transcriptome analysis reveals global gene expression changes of Chilo suppressalis in response to sublethal dose of chlorantraniliprole	transcriptomics		chilo_suppressalis	chlorantraniliprole	arthropod	multiple	terrestrial	animalia		insecta	lepidoptera	crambidae
2004	Toxicological, cellular and gene expression responses in earthworms exposed to copper and cadmium	transcriptomics		eisenia_fetida	copper, cadmium	annelid	soil	terrestrial	animalia		clitellata	opisthopora	lumbricidae
2011	Gene expression of zebrafish embryos exposed to titanium dioxide nanoparticles and hydroxylated fullerenes	transcriptomics		Danio_rerio	titanium dioxide nanoparticles	chordata	freshwater	aquatic	animalia		actinopterygii	cypriniformes	cyprinidae
2013	De novo characterization of japanese scallop Mizuhopecten yessoensis transcriptome and analysis of its gene expression following cadmium exposure	transcriptomics		mizuhopecten_yessoensis	cadmium	mollusca	marine	aquatic	animalia		bivalvia	pectinida	pectinidae
2019	High-throughput transcriptomics: Insights into the pathways involved in (nano)nickel toxicity in a key invertebrate test species	transcriptomics		enchytraeus_crypticus	nickel	annelid	soil	terrestrial	animalia		clitellata	haplotaxida	enchytraeidae
2018	Environmental pollution affects molecular and biochemical responses during gonadal maturation of Astyanax fasciatus (Teleostei: Characiformes: Characidae)	transcriptomics		astyanax_fasciatus	mixture	chordata	freshwater	aquatic	animalia		actinopterygii	characiformes	characidae
2016	Quantitative proteomic analysis of Dunaliella salina upon acute arsenate exposure	proteomics		dunaliella_salina	arsenate	chlorophyta	marine	aquatic	plantae		chlorophyceae	chlamydomonadales	dunaliellaceae
2020	Dataset for proteomic analysis of Chlorella sorokiniana cells under cadmium stress	proteomics		chlorella_sorokiniana	cadmium	chlorophyta	freshwater	aquatic	plantae		trebouxiophyceae	chlorellales	chlorellaceae
2018	Alterations in the proteomic composition of Serratia marcescens in response to manganese (II)	proteomics		serratia_marcescens	manganese	protobacteria	multiple	terrestrial	bacteria		gammaproteobacteria	enterobacterales	yersiniaceae
2006	Differential protein expression profiles in anterior gills of Eriocheir sinensis during acclimation to cadmium	proteomics		Eriocheir_sinensis	cadmium	arthropod	multiple	multiple	animalia		malacostraca	decapoda	varunidae
2011	Proteome profiles in medaka (Oryzias melastigma) liver and brain experimentally exposed to acute inorganic mercury	proteomics		oryzias_melastigma	mercury	chordata	freshwater	multiple	animalia		actinopterygii	beloniformes	adrianichthyidae
2012	Herbicide effects on Chlamydomonas reinhardtii assessed on physiological and molecular levels	proteomics		chlamydomonas_reinhardtii	paraquat, diuron, norflurazon	chlorophyta	freshwater	aquatic	plantae		chlorophyceae	chlamydomonadales	chlamydomonadaceae
2010	Effects of diazepam on gene expression and link to physiological effects in different life stages in zebrafish danio rerio	transcriptomics		Danio_rerio	diazepam	chordata	freshwater	aquatic	animalia		actinopterygii	cypriniformes	cyprinidae
2012	Mercury-induced hepatotoxicity in zebrafish: in vivo mechanistic insights from transcriptome analysis, phenotype anchoring and targeted gene expression validation	transcriptomics		Danio_rerio	mercury	chordata	freshwater	aquatic	animalia		actinopterygii	cypriniformes	cyprinidae
2007	Transcriptional profiling reveals barcode-like toxicogenomic responses in the zebrafish embryo	transcriptomics		Danio_rerio	methylmercury, cadmium, aroclor, acrylamide, tert-butylhydroquinone, 4-chloroaniline, DTT, TCDD, valproic acid	chordata	freshwater	aquatic	animalia		actinopterygii	cypriniformes	cyprinidae
2014	Transcriptomics profiling and steroid production in mummichog (Fundulus heteroclitus) testes after treatment with 5 alpha-dihydrotestosterone	transcriptomics		fundulus_heteroclitus	5 alpha-dihydrotestosterone	chordata	marine	aquatic	animalia		actinopterygii	cyprinodontiformes	fundulidae
2010	Dose-responsive gene expression changes in juvenile and adult mummichogs (Fundulus heteroclitus) after arsenic exposure	transcriptomics		fundulus_heteroclitus	arsenic	chordata	marine	aquatic	animalia		actinopterygii	cyprinodontiformes	fundulidae
2010	comparative transcriptomics implicates mechanisms of evolved pollutioin tolerance in a killifish population	transcriptomics		fundulus_heteroclitus	PCB	chordata	marine	aquatic	animalia		actinopterygii	cyprinodontiformes	fundulidae
2014	Genomic and genotoxic responses to controlled weathered-oil exposures confirm and extend field studies on impacts of the Deepwater horizon oil spill on native killifish	transcriptomics		fundulus_heteroclitus	oil	chordata	marine	aquatic	animalia		actinopterygii	cyprinodontiformes	fundulidae
2010	Embryonic gene expression among pollutant resistant and sensitive Fundulus heteroclitus populations	transcriptomics		fundulus_heteroclitus	none	chordata	marine	aquatic	animalia		actinopterygii	cyprinodontiformes	fundulidae
2007	Convergence and divergence in gene expression among natural populations exposed to pollution	transcriptomics		fundulus_heteroclitus	mixture	chordata	marine	aquatic	animalia		actinopterygii	cyprinodontiformes	fundulidae
2008	Changes in gene expression due to chronic exposure to environmental pollutants	transcriptomics		fundulus_heteroclitus	mixture	chordata	marine	aquatic	animalia		actinopterygii	cyprinodontiformes	fundulidae
2019	A systems biology approach reveals neuronal and muscle developmental defects after chronic exposure to ionising radiation in zebrafish	multi_omics	tr_pr	Danio_rerio	ionising radiation	chordata	freshwater	aquatic	animalia		actinopterygii	cypriniformes	cyprinidae
2010	Impacts of mixtures of herbicides on molecular and physiological responses of the European flounder Platichthys flesus	transcriptomics		Platichthys_flesus	glyphosate, AMPA, mecoprop, acetochlor	chordata	marine	aquatic	animalia		actinopterygii	pleuronectiformes	pleuronectidae
2017	Transcriptional changes in innate immunity genes in head kidneys from Aeromonas salmonicida challenged rainbow trout fed a mixture of polycyclic aromatic hydrocarbons	transcriptomics		Aeromonas_salmonicida	polycyclic aromatic hydrocarbons	protobacteria	multiple	aquatic	animalia		gammaproteobacteria	aeromonadales	aeromonadaceae
2019	Transcriptomic analysis reveals potential mechanisms of toxicity in a combined exposure to dibutyl phthalate and diisobutyl phthalate in zebrafish Danio rerio	transcriptomics		Danio_rerio	dibutyl phthalate, diisobutyl phthalate	chordata	freshwater	aquatic	animalia		actinopterygii	cypriniformes	cyprinidae
2012	Hepatic proteome changes in Solea senegalensis exposed to contaminated estuarine sediments: A laboratory and in situ survey	proteomics		solea_senegalensis	mixture	chordata	marine	aquatic	animalia		actinopterygii	pleuronectiformes	soleidae
2010	Alterations to proteome and tissue recovery responses in fish liver caused by a short-term combination treatment with cadmium and benzo(a)pyrene	proteomics		solea_senegalensis	cadmium, benzo(a)pyrene	chordata	marine	aquatic	animalia		actinopterygii	pleuronectiformes	soleidae
2015	Proteomic analysis of the European flounder Platichthys flesus response to experimental PAH-PCB contamination	proteomics		Platichthys_flesus	PAH-PCB	chordata	marine	aquatic	animalia		actinopterygii	pleuronectiformes	pleuronectidae
2014	Toxicological assessment of trace ß-diketone antibiotic mixtures on zebrafish Danio rerio by proteomic analysis	proteomics		Danio_rerio	ß-diketone	chordata	freshwater	aquatic	animalia		actinopterygii	cypriniformes	cyprinidae
2012	Environmental contaminant mixtures at ambient concentrations invoke a metabolic stress response in goldfish not predicted from exposure to individual compounds alone	metabolomics		carassius_auratus	bisphenol A, DEHP, nonylphenol	chordata	freshwater	aquatic	animalia		actinopterygii	cypriniformes	cyprinidae
2017	Disruption of the prostaglandin Metabolome and characterization of the pharmaceutical exposome in fish exposed to wastewater treatment works effluent as revealed by nanoflow-nanospray Mass spectrometry-based metabolomics	metabolomics		ritulis_rutilus	mixture	chordata	freshwater	aquatic	animalia		actinopterygii	cypriniformes	cyprinidae
2016	Pesticide mixture toxicity in surface water extracts in Snails Lymnaea stagnalis by an in vitro acetylcholinesterase inhibition assay and metabolomics	metabolomics		lymnaea_stagnalis	imidacloprid, thiacloprid, pirimicarb	mollusca	freshwater	aquatic	animalia		gastropoda	basommatophora	lymnaeidae
2016	Toxicological effects of benzoapyrene, DDT and their mixture on the green mussel Perna viridis revealed by proteomic and metabolomic approaches	multi_omics	pr_me	perna_viridis	benzoapyrene, DDT	mollusca	marine	aquatic	animalia		bivalvia	mytilida	mytilidae
2014	Molecular responses of European flounder Platichthys flesus chronically exposed to contaminated estuarine sediments	multi_omics	tr_me	Platichthys_flesus	mixture	chordata	marine	aquatic	animalia		actinopterygii	pleuronectiformes	pleuronectidae
2009	Nickel and binary metal mixture responses in Daphnia magna: Molecular fingerprints and suborganismal effects	transcriptomics		daphnia_magna	nickel	arthropod	freshwater	aquatic	animalia		branchiopoda	cladocera	daphniidae
2010	Transcriptomic and proteomic effects of a neonicotinoid insecticide mixture in the marine mussel Mytilus galloprovincialis, Lam.	multi_omics	tr_pr	mytilus_galloprovincialis	imidacloprid, thiacloprid	mollusca	marine	aquatic	animalia		bivalvia	mytilida	mytilidae
2017	Transcriptomic responses of the endangered freshwater mussel Margaritifera margaritifera to trace metal contamination in the Dronne River, France	transcriptomics		margaritifera_margaritifera	chromium, zinc, cadmium, nickel	mollusca	freshwater	aquatic	animalia		bivalvia	unionida	margaritiferidae
2018	Ecotoxicological effects of the herbicide glyphosate in non-target aquatic species: Transcriptional responses in the mussel Mytilus galloprovincialis	transcriptomics		mytilus_galloprovincialis	glyphosate	mollusca	freshwater	aquatic	animalia		bivalvia	mytilida	mytilidae
2015	Deciphering the molecular adaptation of the king scallop (Pecten maximus) to heat stress using transcriptomics and proteomics	multi_omics	tr_pr	pecten_maximus	temperature	mollusca	marine	aquatic	animalia		bivalvia	pectinida	pectinidae
2010	Transcriptomic responses to heat stress in invasive and native blue mussels (genus Mytilus): molecular correlates of invasive success	transcriptomics		mytilus_edulis	temperature	mollusca	freshwater	aquatic	animalia		bivalvia	mytilida	mytilidae
2020	Proteomic analysis of Aspergillus niger 3.316 under heat stress	proteomics		aspergillus_niger	temperature	ascomycota	multiple	terrestrial	fungi		eurotiomycetes	eurotiales	trichocomaceae
2008	Protein profiling of the dimorphic, pathogenic fungus, Penicillium marneffei	proteomics		penicillium_marneffei	temperature	ascomycota	multiple	terrestrial	fungi		eurotiomycetes	eurotiales	trichocomaceae
2015	Integrative analyses reveal transcriptome-proteome correlation in biological pathways and secondary metabolism clusters in A. Flavus in response to temperature	multi_omics	tr_pr	aspergillus_flavus	temperature	ascomycota	multiple	terrestrial	fungi		eurotiomycetes	eurotiales	trichocomaceae
2011	Response to osmotic stress and temperature of the fungus Ustilago maydis	proteomics		ustilago_maydis	temperature	basidiomycets	multiple	terrestrial	fungi		ustilaginomycetes	ustilaginales	ustilaginaceae
2018	ITRAQ-based quantitative proteomic analysis reveals proteomic changes in mycelium of Pleurotus ostreatus in response to heat stress and subsequent recovery	proteomics		pleurotus_ostreatus	temperature	basidiomycets	multiple	terrestrial	fungi		agariomycetes	agaricales	pleurotaceae
2010	Integrative analysis of the heat shock response in Aspergillus fumigatus	proteomics		aspergillus_fumigatus	temperature	ascomycota	multiple	terrestrial	fungi		eurotiomycetes	eurotiales	trichocomaceae
2020	Multi-omics analysis provides novel insight into immuno-physiological pathways and development of thermal resistance in rainbow trout exposed to acute thermal stress	multi_omics	tr_pr	Oncorhynchus_mykiss	temperature	chordata	freshwater	aquatic	animalia		actinopterygii	salmoniformes	salmonidae
2019	Comparative proteomics of stenotopic caddisfly Crunoecia irrorata identifies acclimation strategies to warming	proteomics		crunoecia_irrorata	temperature	arthropod	freshwater	aquatic	animalia		insecta	trichoptera	lepidostomatidae
2018	Multi-omics analysis of thermal stress response in a zooxanthellate cnidarian reveals the importance of associating with thermotolerant symbiont	multi_omics	tr_pr	aiptasia_pallida	temperature	cnidaria	marine	aquatic	animalia		anthozoa	actiniaria	aiptasiidae
2017	Cadmium effects on DNA and protein metabolism in oyster (Crassostrea gigas) revealed by proteomic analysis	proteomics		crassostrea_gigas	cadmium	mollusca	marine	aquatic	animalia		bivalvia	ostreida	ostreidae
2019	Antagonistic interactions between benzo[a]pyrene and fullerene (C60) in toxicological response of marine mussels	proteomics		mytilus_galloprovincialis	benzo(a)pyrene, fullerene	mollusca	marine	aquatic	animalia		bivalvia	mytilida	mytilidae
2005	Development of a coral cDNA microarray to examine gene expression profiles in Montastrea faveolata exposed to environmental stress	transcriptomics		montastrea_faveolata	temperature, salinity, UV	cnidaria	marine	aquatic	animalia		anthozoa	scleractinia	montastraeidae
2008	Response of the symbiotic cnidarian Anthopleura elegantissima transcriptome to temperature and UV increase	transcriptomics		anthopleura_elegantissima	temperature, UV	cnidaria	marine	aquatic	animalia		anthozoa	actiniaria	actiniidae
2009	Genetic variation in responses to a settlement cue and elevated temperature in the reef-building coral Acropora millepora	transcriptomics		acropora_millepora	temperature	cnidaria	marine	aquatic	animalia		anthozoa	scleractinia	montastraeidae
2014	Lineage-specific transcriptional profiles of Symbiodinium spp. Unaltered by heat stress in a coral host	transcriptomics		symbiodinium_spp	temperature	dinoflagellata	marine	aquatic	chromista		dinophyceae	suessiales	symbiodiniaceae
2008	Differential gene expression during thermal stress and bleaching in the caribbean coral montastraea faveolata	transcriptomics		montastrea_faveolata	temperature	cnidaria	marine	aquatic	animalia		anthozoa	scleractinia	merulinidae
2010	Transcriptomic responses to heat stress and bleaching in the elkhorn coral Acropora palmata	transcriptomics		acropora_palmata	temperature	cnidaria	marine	aquatic	animalia		anthozoa	scleractinia	acroporidae
2013	Gene expression under chronic heat stress in populations of the mustard hill coral (Porites astreoides) from different thermal environments	transcriptomics		porites_astreoides	temperature	cnidaria	marine	aquatic	animalia		anthozoa	scleractinia	poritidae
2016	Gene expression profiles during short-term heat stress; branching vs. Massive Scleractinian corals of the Red Sea	transcriptomics		stylophora_pistillata, acropora_eurystoma, porites_sp	temperature	cnidaria	marine	aquatic	animalia		anthozoa
2010	Development and heat stress-induced transcriptomic changes during embryogenesis of the scleractinian coral Acropora palmata	transcriptomics		acropora_palmata	temperature	cnidaria	marine	aquatic	animalia		anthozoa	scleractinia	montastraeidae
2009	Early molecular responses of coral larvae to hyperthermal stress	transcriptomics		acropora_millepora	temperature	cnidaria	marine	aquatic	animalia		anthozoa	scleractinia	montastraeidae
2009	Effects of temperature on gene expression in embryos of the coral Montastraea faveolata	transcriptomics		montastrea_faveolata	temperature	cnidaria	marine	aquatic	animalia		anthozoa	scleractinia	montastraeidae
2015	Proteomics links the redox state to calcium signaling during bleaching of the scleractinian coral Acropora microphthalma on exposure to high solar irradiance and thermal stress	proteomics		acropora_microphthalma	temperature, radiation	cnidaria	marine	aquatic	animalia		anthozoa	scleractinia	montastraeidae
2015	Whole transcriptome analysis reveals changes in expression of immune-related genes during and after bleaching in a reef-building coral	transcriptomics		orbicella_faveolata	temperature	cnidaria	marine	aquatic	animalia		anthozoa	scleractinia	montastraeidae
2010	Location-specific responses to thermal stress in larvae of the reef-building coral montastaea faveolata	transcriptomics		montastrea_faveolata	temperature	cnidaria	marine	aquatic	animalia		anthozoa	scleractinia	montastraeidae
2016	Metabolomic signatures of increases in temperature and ocean acidification from the reef-building coral, Pocillopora damicornis	metabolomics		pocillopora_damicornis	temperature, acidification	cnidaria	marine	aquatic	animalia		anthozoa	scleractinia	pocilloporidae
2006	The environmental estrogen, 4-nonylphenol modules brain estrogen-receptor- and aromatase (CYP19) isoforms gene expression patterns in Atlantic salmon (Salmo salar)	transcriptomics		salmo_salar	nonylphenol	chordata	marine	aquatic	animalia		actinopterygii	salmoniformes	salmonidae
2007	Targeted salmon gene array (SalArray): a toxicogenomic tool for gene expression profiling of interactions between estrogen and aryl hydrocarbon receptor signalling pathways	transcriptomics		salmo_salar	nonylphenol, TCB	chordata	marine	aquatic	animalia		actinopterygii	salmoniformes	salmonidae
2007	Gene expression responses of European flounder (Platichthys flesus) to 17-beta-estradiol	transcriptomics		Platichthys_flesus	17-beta-estradiol	chordata	marine	aquatic	animalia		actinopterygii	pleuronectiformes	pleuronectidae
2007	Proteomics-based method for the assessment of marine pollution using liquid chromatography coupled with two-dimensional electrophoresis	proteomics		mytilus_edulis	mixture	mollusca	freshwater	aquatic	animalia		bivalvia	mytilida	mytilidae
2006	Identification of proteomic signatures of exposure to marine pollutants in mussels (Mytilus edulis)	proteomics		mytilus_edulis	diallyl phatalate, bisphenol A, PBDE-47	mollusca	freshwater	aquatic	animalia		bivalvia	mytilida	mytilidae
2004	Surface-enhanced laser desorption/ionization-time of flight-mass spectrometry approach to biomarker discovery in blue mussels (Mytilus edulis) exposed to polyaromatic hydrocarbons and heavy metals under field conditions	proteomics		mytilus_edulis	polyaromatic hydrocarbons, heavy metals	mollusca	freshwater	aquatic	animalia		bivalvia	mytilida	mytilidae
2007	Peroxisomal proteomic approach for protein profiling in blue mussels (Mytilus edulis) exposed to crude oil	proteomics		mytilus_edulis	oil	mollusca	freshwater	aquatic	animalia		bivalvia	mytilida	mytilidae
2009	Characterization of the metabolic actions of crude versus dispersed oil in salmon smolts via NMR-based metabolomics	metabolomics		oncorhynchus_tshawytscha	oil	chordata	marine	aquatic	animalia		actinopterygii	salmoniformes	salmonidae
2010	Metabolic responses produced by crude versus dispersed oil in Chinook salmon presmolts via NMR-based metabolomics	metabolomics		oncorhynchus_tshawytscha	oil	chordata	marine	aquatic	animalia		actinopterygii	salmoniformes	salmonidae
2006	Gene transcription profiling in pollutant exposed mussels (Mytilus spp.) using a new low-density oligonucleotide microarray	transcriptomics		mytilus_spp	mercury, oil	mollusca	marine	aquatic	animalia		bivalvia	mytilida	mytilidae
2005	Molecular identification and expression study of differentially regulated genes in the pacific oyster crassostrea gigas in response to pesticide exposure	transcriptomics		crassostrea_gigas	atrazine, diuron, isoproturon	mollusca	marine	aquatic	animalia		bivalvia	ostreida	ostreidae
2006	Oxidative stress response of European flunder (Platichthys flesus) to cadmium determined by a custom cDNA microarray	transcriptomics		Platichthys_flesus	oxidative_stress	chordata	marine	aquatic	animalia		actinopterygii	pleuronectiformes	pleuronectidae
2009	Effect of cadmium in the clam Ruditapes decussatus assessed by proteomic analysis	proteomics		ruditapes_decussatus	cadmium	mollusca	marine	aquatic	animalia		bivalvia	venerida	veneridae
2011	Differential toxicological effects induced by mercury in gills from three pedigrees of Manila clam ruditapes philippinarum by NMR-based metabolomics	metabolomics		ruditapes_decussatus	mercury	mollusca	marine	aquatic	animalia		bivalvia	venerida	veneridae
2010	NMR-based metabolomic studies on the toxicological effects of cadmium and copper on green mussels Perna viridis	metabolomics		perna_viridis	cadmium, copper	mollusca	marine	aquatic	animalia		bivalvia	mytilida	mytilidae
2011	Proteomic analysis of methyl parathion – responsive proteins in Sparus latus liver	proteomics		sparus_latus	methyl parathion	chordata	marine	aquatic	animalia		actinopterygii	perciformes	sparidae
2011	Relationship between mRNA biomarker candidates and location near a marine municipal wastewater outfall in the benthic indicator species Modiolus modiolus	transcriptomics		modiolus_modiolus	mixture	mollusca	marine	aquatic	animalia		bivalvia	mytilida	mytilidae
2009	Gene expression profiling in the deep water horse mussel Modiolus modiolus (L.) located near a marine municipal wastewater outfall	transcriptomics		modiolus_modiolus	mixture	mollusca	marine	aquatic	animalia		bivalvia	mytilida	mytilidae
2017	Functional and molecular responses of the blue mussel Mytilus edulis hemocytes exposed to cadmium – an in vitro model and transcriptomic approach	transcriptomics		mytilus_edulis	cadmium	mollusca	freshwater	aquatic	animalia		bivalvia	mytilida	mytilidae
2016	Uncovering the complex transcriptome response of Mytilus Chilensis against saxitoxin: implications of harmful algal blooms on mussel populations	transcriptomics		mytilus_chilensis	saxitoxin	mollusca	marine	aquatic	animalia		bivalvia	mytilida	mytilidae
2011	A proteomic analysis of the effects of metal contamination on Sydney rock oyster (Saccostrea glomerata) haemolymph	proteomics		saccostrea_glomerata	copper, lead, zinc	mollusca	marine	aquatic	animalia		bivalvia	ostreida	ostreidae
2012	Proteomic discovery of biomarkers of metal contamination in Sydney rock oysters (Saccostrea glomerata)	proteomics		saccostrea_glomerata	cadmium, copper, lead, zinc	mollusca	marine	aquatic	animalia		bivalvia	ostreida	ostreidae
2012	Quantitative proteomics of heavy metal stress responses in Sydney rock oysters	proteomics		saccostrea_glomerata	copper, zinc, lead	mollusca	marine	aquatic	animalia		bivalvia	ostreida	ostreidae
2016	Wild populations of Sydney rock oysters differ in their proteomic responses to elevated carbon dioxide	proteomics		saccostrea_glomerata	carbon dioxide	mollusca	marine	aquatic	animalia		bivalvia	ostreida	ostreidae
2016	Proteomic analysis of hemolymph from poly(I:C)-stimulated Crassostrea gigas	proteomics		crassostrea_gigas	polyinosinic_polycytidy	mollusca	marine	aquatic	animalia		bivalvia	ostreida	ostreidae
2018	Copper-induced immunomodulation in mussel (Perna canaliculus) haemocytes	metabolomics		perna_canaliculus	copper	mollusca	marine	aquatic	animalia		bivalvia	mytilida	mytilidae
2016	Haemolymph from Mytilus galloprovincialis: response to copper and temperature challenges studied by 1H-NMR metabonomics	metabolomics		mytilus_galloprovincialis	temperature, copper	mollusca	marine	aquatic	animalia		bivalvia	mytilida	mytilidae
